1 The eyes reflect an internal cognitive state hidden in the population  
2 activity of cortical neurons

3

4 Richard Johnston<sup>1, 2, 3</sup>, Adam C. Snyder<sup>4, 5, 6</sup>, Sanjeev B. Khanna<sup>3, 7</sup>, Deepa Issar<sup>1</sup> and Matthew A.  
5 Smith<sup>1, 2, 3</sup>

6

7 <sup>1</sup>Department of Biomedical Engineering, Carnegie Mellon University, Pittsburgh, USA;  
8 <sup>2</sup>Neuroscience Institute, Carnegie Mellon University, Pittsburgh, USA; <sup>3</sup>Center for the Neural  
9 Basis of Cognition, Carnegie Mellon University, Pittsburgh, USA; <sup>4</sup>Department of Brain and  
10 Cognitive Sciences, University of Rochester, Rochester, USA; <sup>5</sup>Department of Neuroscience,  
11 University of Rochester, Rochester, USA; <sup>6</sup>Center for Visual Science, University of Rochester,  
12 Rochester, USA; <sup>7</sup> Department of Bioengineering, University of Pittsburgh, Pittsburgh, USA.

13

14 Corresponding author:

15 Matthew A. Smith, PhD

16 Carnegie Mellon University

17 Department of Biomedical Engineering and Neuroscience Institute

18 Mellon Institute, Room 115

19 Pittsburgh, PA 15213

20 Email: mattsmith@cmu.edu

21

22

23

24

25

26

27

28 Summary

29           Decades of research have shown that global brain states such as arousal can be indexed by  
30 measuring the properties of the eyes. Neural signals from individual neurons, populations of  
31 neurons, and field potentials measured throughout much of the brain have been associated with  
32 the size of the pupil, small fixational eye movements, and vigor in saccadic eye movements.  
33 However, precisely because the eyes have been associated with modulation of neural activity  
34 across the brain, and many different kinds of measurements of the eyes have been made across  
35 studies, it has been difficult to clearly isolate how internal states affect the behavior of the eyes,  
36 and vice versa. Recent work in our laboratory identified a latent dimension of neural activity in  
37 macaque visual cortex on the timescale of minutes to tens of minutes. This ‘slow drift’ was  
38 associated with perceptual performance on an orientation-change detection task, as well as neural  
39 activity in visual and prefrontal cortex (PFC), suggesting it might reflect a shift in a global brain  
40 state. This motivated us to ask if the neural signature of this internal state is correlated with the  
41 action of the eyes in different behavioral tasks. We recorded from visual cortex (V4) while  
42 monkeys performed a change detection task, and the prefrontal cortex, while they performed a  
43 memory-guided saccade task. On both tasks, slow drift was associated with a pattern that is  
44 indicative of changes in arousal level over time. When pupil size was large, and the subjects were  
45 in a heightened state of arousal, microsaccade rate and reaction time decreased while saccade velocity  
46 increased. These results show that the action of the eyes is associated with a dominant mode of  
47 neural activity that is pervasive and task-independent, and can be accessed in the population  
48 activity of neurons across the cortex.

49

50

51 Introduction

52           In the fields of psychology and neuroscience, the eyes are often viewed as a window to the  
53 brain. Much has been learned about cognitive processes, and their development, from studying the  
54 action of the eyes (Aslin, 2012; Eckstein, Guerra-Carrillo, Miller Singley, & Bunge, 2017;  
55 Hannula et al., 2010; Hessels & Hooge, 2019; König et al., 2016; Ryan & Shen, 2020). In addition,  
56 a large body of research has shown that properties related to the eyes can be used to index global  
57 brain states such as arousal, motivation and cognitive effort (Di Stasi, Catena, Cañas, Macknik, &  
58 Martinez-Conde, 2013; Joshi & Gold, 2019; Mathôt, 2018; C. A. Wang & Munoz, 2015). The  
59 action of the eyes can be considered broadly in two contexts – the action of the pupil when the  
60 eyes are relatively stable, and the action of the eyes when they move, be it voluntarily, in response  
61 to novel objects in the visual field, or involuntarily during periods of steady fixation. In each  
62 context, technological advancements in infrared eye-tracking have allowed rich insight about a  
63 subject’s global brain state to be surmised in a rapid, accurate and non-invasive manner (Kimmel,  
64 Mammo, & Newsome, 2012).

65           When the eyes are relatively stable, the size of the pupil changes in response to the amount of  
66 light hitting the retina (Campbell & Gregory, 1960). However, the pupil does not merely reflect  
67 accommodation. Instead, the size of the pupil is controlled by a balance between parasympathetic  
68 and sympathetic pathways that reflect both light-driven accommodation and central modulation.  
69 Several studies have shown that pupil size is associated with arousal (Joshi & Gold, 2019; Mathôt,  
70 2018; C. A. Wang & Munoz, 2015). In the mammalian brain, arousal has been largely associated  
71 with the activity of the locus coeruleus (LC) (Aston-Jones & Cohen, 2005; Sara, 2009; van den  
72 Brink, Pfeffer, & Donner, 2019). This small structure in the pons contains a dense population of  
73 noradrenergic neurons and is the primary source of norepinephrine (NE) to the central nervous

74 system. Recent neurophysiological work carried out in rodents and non-human primates has shown  
75 that pupil size is significantly associated with the spiking responses of LC neurons (Breton-  
76 Provencher & Sur, 2019; Joshi, Li, Kalwani, & Gold, 2016; Reimer et al., 2016; Varazzani, San-  
77 Galli, Gilardeau, & Bouret, 2015). Under conditions of heightened arousal, increases in LC activity  
78 and NE concentration are accompanied by increases in pupil size (Aston-Jones & Cohen, 2005;  
79 Sara, 2009; van den Brink et al., 2019).

80 Voluntary saccades occur ~3 times per second to bring novel objects onto the high-resolution  
81 fovea (Kowler, 2011). The characteristics of these saccades, such as the reaction time to initiate  
82 the saccade, and the velocity reached during the saccade, have similarly been used to index global  
83 changes in arousal (Di Stasi et al., 2013). For example, when arousal is increased by delivering a  
84 startling auditory stimulus prior to the execution of a saccade, reaction time decreases and saccade  
85 velocity increases (Castellote, Kumru, Queralt, & Valls-Solé, 2007; Deuter, Schilling, Kuehl,  
86 Blumenthal, & Schachinger, 2013; DiGirolamo, Patel, & Blaukopf, 2016; Kristjánsson,  
87 Vandenbroucke, & Driver, 2004). Another metric that has been linked to global brain states,  
88 although to a lesser extent than reaction time and saccade velocity, is microsaccade rate. These  
89 small involuntary saccades are generated at a rate of 1-2Hz through the activity of neurons in the  
90 superior colliculus (SC) (Rolfs, 2009). Evidence suggests that microsaccade rate decreases with  
91 increased cognitive effort on a range of behavioral tasks (Gao, Yan, & Sun, 2015; Siegenthaler et  
92 al., 2014; Valsecchi, Betta, & Turatto, 2007; Valsecchi & Turatto, 2009). Taken together, these  
93 results suggest that the action of the eyes, be it when they are relatively stable and when they move,  
94 can be used to index global brain states.

95 A number of studies have related the activity of single neurons in many regions of the brain to  
96 pupil size (Joshi et al., 2016; Reimer et al., 2014), microsaccade rate (Bair & O'Keefe, 1998; Chen,

97 Ignashchenkova, Thier, & Hafed, 2015; Herrington et al., 2009; Leopold & Logothetis, 1998;  
98 Lowet et al., 2018; Martinez-Conde, Macknik, & Hubel, 2000; Snodderly, Kagan, & Moshe,  
99 2001), reaction time (Cook & Maunsell, 2002; Hanes & Schall, 1996; Khanna, Snyder, & Smith,  
100 2019; Roitman & Shadlen, 2002; Steinmetz & Moore, 2019; Supèr & Lamme, 2007) and saccade  
101 velocity (Huang & Lisberger, 2009; O’Leary & Lisberger, 2012). However, if changes in these  
102 eye metrics are driven by a shift in an underlying internal state, then one might expect them all to  
103 be related to a common underlying neural activity pattern. Recent work in our laboratory used  
104 dimensionality reduction to identify a dominant mode of neural activity called slow drift that was  
105 related to behavior in a change detection task and present in both visual and prefrontal cortex in  
106 the macaque (Cowley et al., 2020). If such a prevalent change in brain-wide neural activity was  
107 truly reflective of a changing internal state, then it might also be reflective of wide-ranging changes  
108 in behavior. This motivated us to ask if our measure of the brain’s internal state (“slow drift”) is  
109 related to the activity of the eyes in different behavioral tasks. We recorded the spiking responses  
110 of populations of neurons in V4 while monkeys performed a change detection task and PFC while  
111 the same subjects performed a memory-guided saccade task. On both tasks, slow drift was  
112 associated with a pattern that is indicative of changes in the subjects’ arousal level over time. When  
113 pupil size increased, microsaccade rate and reaction time decreased while saccade velocity  
114 increased. These results show that the collective action of the eyes is associated with a dimension  
115 of neural activity that is pervasive and task-independent. They support the view that slow drift  
116 indexes a global brain state that manifests in the movement of the eyes and the size of the pupil.

## 117 Results

118 To determine if observation of the eyes could provide insight into the internal state  
119 associated with slow drift, we recorded the spiking responses of populations of neurons in two

120 macaque monkeys using 100-channel “Utah” arrays. We recorded from neurons in 1) V4 while  
121 the subjects performed an orientation-change detection task (Figure 1A); and 2) PFC while they  
122 performed a memory-guided saccade task (Figure 1B). Behavioral data for both subjects on the  
123 change detection task (Snyder, Yu, & Smith, 2018) and the memory-guided saccade task (Khanna,  
124 Scott, & Smith, 2019) has been published before in reports analyzing distinct aspects of the  
125 experiments described in this study. Here, the primary goal was to determine whether the neural  
126 population activity was related to eye metrics in a predictable manner across tasks. We analyzed  
127 data recorded in V4 on the change detection task because neural activity in midlevel visual areas  
128 has long been associated with performance on perceptual decision-making tasks (Shadlen, Britten,  
129 Newsome, & Movshon, 1996). Similarly, neural activity in PFC is correlated with performance on  
130 memory-guided saccade tasks (Funahashi, Bruce, & Goldman-Rakic, 1989). Four eye metrics  
131 were recorded during each session: pupil size, microsaccade rate, reaction time and saccade  
132 velocity. These metrics were chosen because they have been used extensively to index global  
133 changes in brain state (see Introduction), and can be measured easily and accurately with an  
134 infrared eye tracker (Kimmel et al., 2012). We made each of these four measurements on every  
135 trial of both behavioral tasks (Figure 1). Similar trends were observed in both subjects in a number  
136 of individual sessions (Figure 4 – figure supplement 2 and Figure 4 – figure supplement 3). For  
137 this reason, and to enhance statistical power, the data for Monkey 1 (20 sessions) and Monkey 2  
138 (16 sessions) was combined for each task.

139

140

141

142

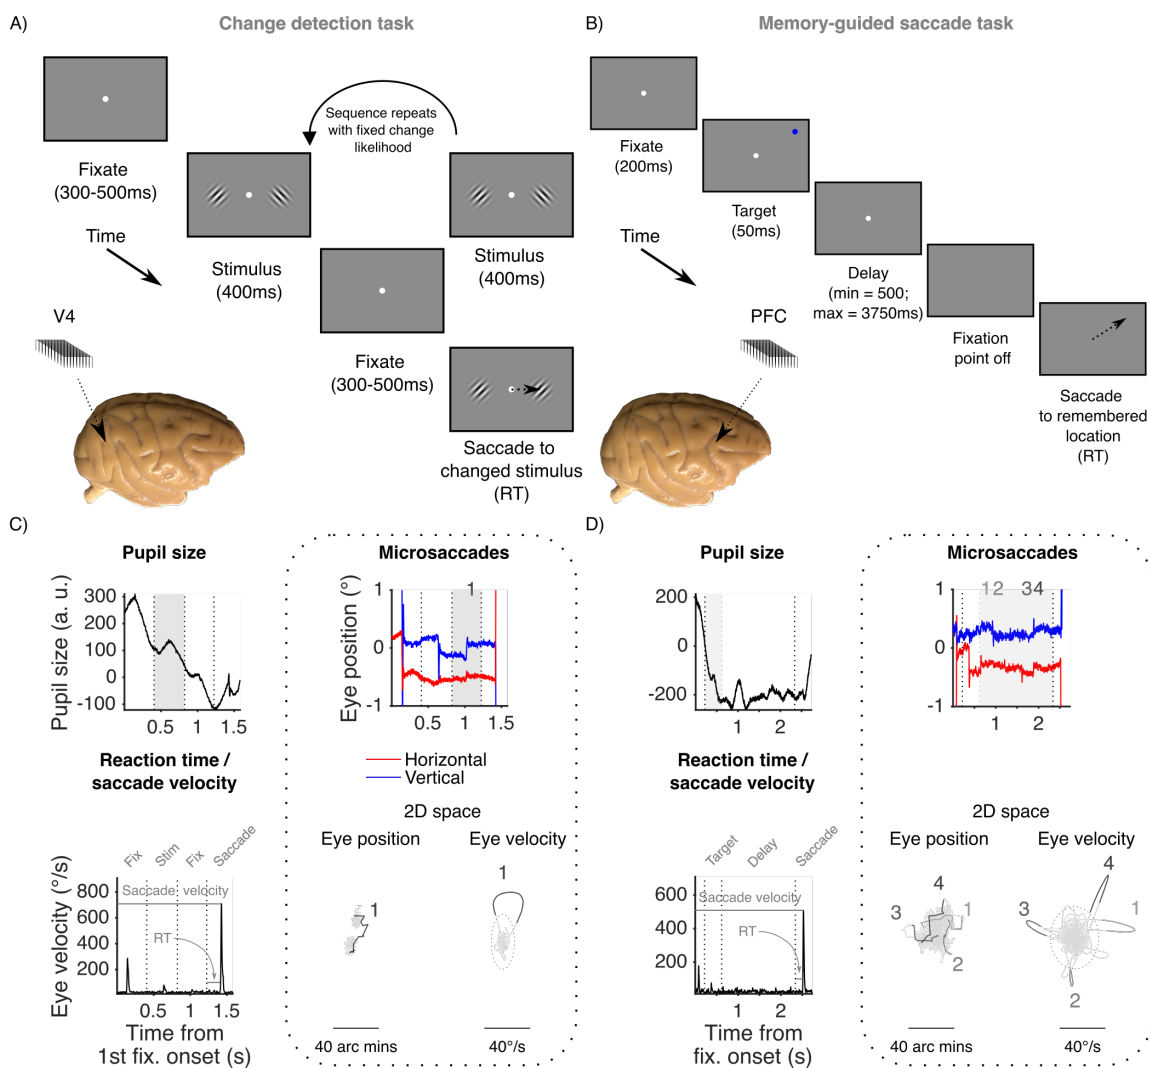

143

144 Figure 1. Experimental methods. (A) Change detection task. After an initial fixation period, a  
 145 sequence of stimuli (orientated Gabors separated by fixation periods) was presented. The subjects'  
 146 task was to detect an orientation change in one of the stimuli and make a saccade to the changed  
 147 stimulus. We recorded neural activity from V4 while the animals performed the change detection  
 148 task using 100-channel "Utah" arrays (inset). (B) Memory-guided saccade task. After an initial  
 149 fixation period, a target stimulus was presented at 1 of 40 locations followed by a delay period.  
 150 The central point was then extinguished prompting the subjects to make a saccade to the  
 151 remembered target location. Neural activity was recorded in PFC while the animals performed the  
 152 memory-guided saccade task using Utah arrays (inset). (C) Measuring eye metrics on the change  
 153 detection task. Mean pupil size was recorded during stimulus periods, whereas microsaccade rate  
 154 was measured during periods of steady fixation (except for the initial fixation period, see *Methods*).  
 155 Microsaccades (emboldened in two-dimensional eye position and eye velocity space) were defined  
 156 as eye movements that exceeded a threshold (dashed circle) for 6ms (Engbert & Kliegl, 2003).  
 157 Reaction time was the time taken to make a saccade to the changed stimulus. Saccade velocity was

158 the peak velocity of the saccade. (D) Measuring eye metrics on the memory-guided saccade task.  
159 Mean pupil size was recorded during the presentation of the target stimulus, whereas microsaccade  
160 rate was measured during the delay period. Reaction time was the time taken to make a saccade to  
161 the remembered target location. Saccade velocity was the peak of velocity of the saccade. RT =  
162 reaction time.

163 Figure supplement 1. Scatter plots and histograms showing the relationship between microsaccade  
164 amplitude and peak velocity.

165

#### 166 Correlations between the eye metrics over time

167 First, we investigated if the different measures of the eyes were themselves correlated over  
168 time during performance of the behavioral task. A large body of work has shown that arousal is  
169 associated with changes in the action of the eyes, be it when they are relatively stable or when they  
170 move. As described above, increases in arousal are typically accompanied by increases in pupil  
171 size and saccade velocity, and concomitant decreases in microsaccade rate and reaction time.  
172 Given that arousal is a domain-general phenomenon, one might expect a similar pattern to emerge  
173 on different behavioral tasks. To explore whether or not this was the case, we binned our eye data  
174 using a 30-minute sliding window stepped every 6 minutes (Figure 2A and Figure 2B). The width  
175 of the window, and the step size, were chosen to isolate slow changes over time based on previous  
176 research. They were the same as those used by Cowley et al. (2020), which meant direct  
177 comparisons could be made across studies. An example session from the same subject on the  
178 change detection task and the memory-guided saccade task is shown in Figure 2C and Figure 2D,  
179 respectively. In the example sessions shown across both tasks a characteristic pattern was observed  
180 that was indicative of slow changes in the subject's arousal level over time. Specifically, a large  
181 tonic pupil size (measured during stimulus periods on the change detection task and target  
182 presentations on the memory-guided saccade task) was associated with high saccade velocity,  
183 shorter reaction times, and a lower rate of microsaccades.



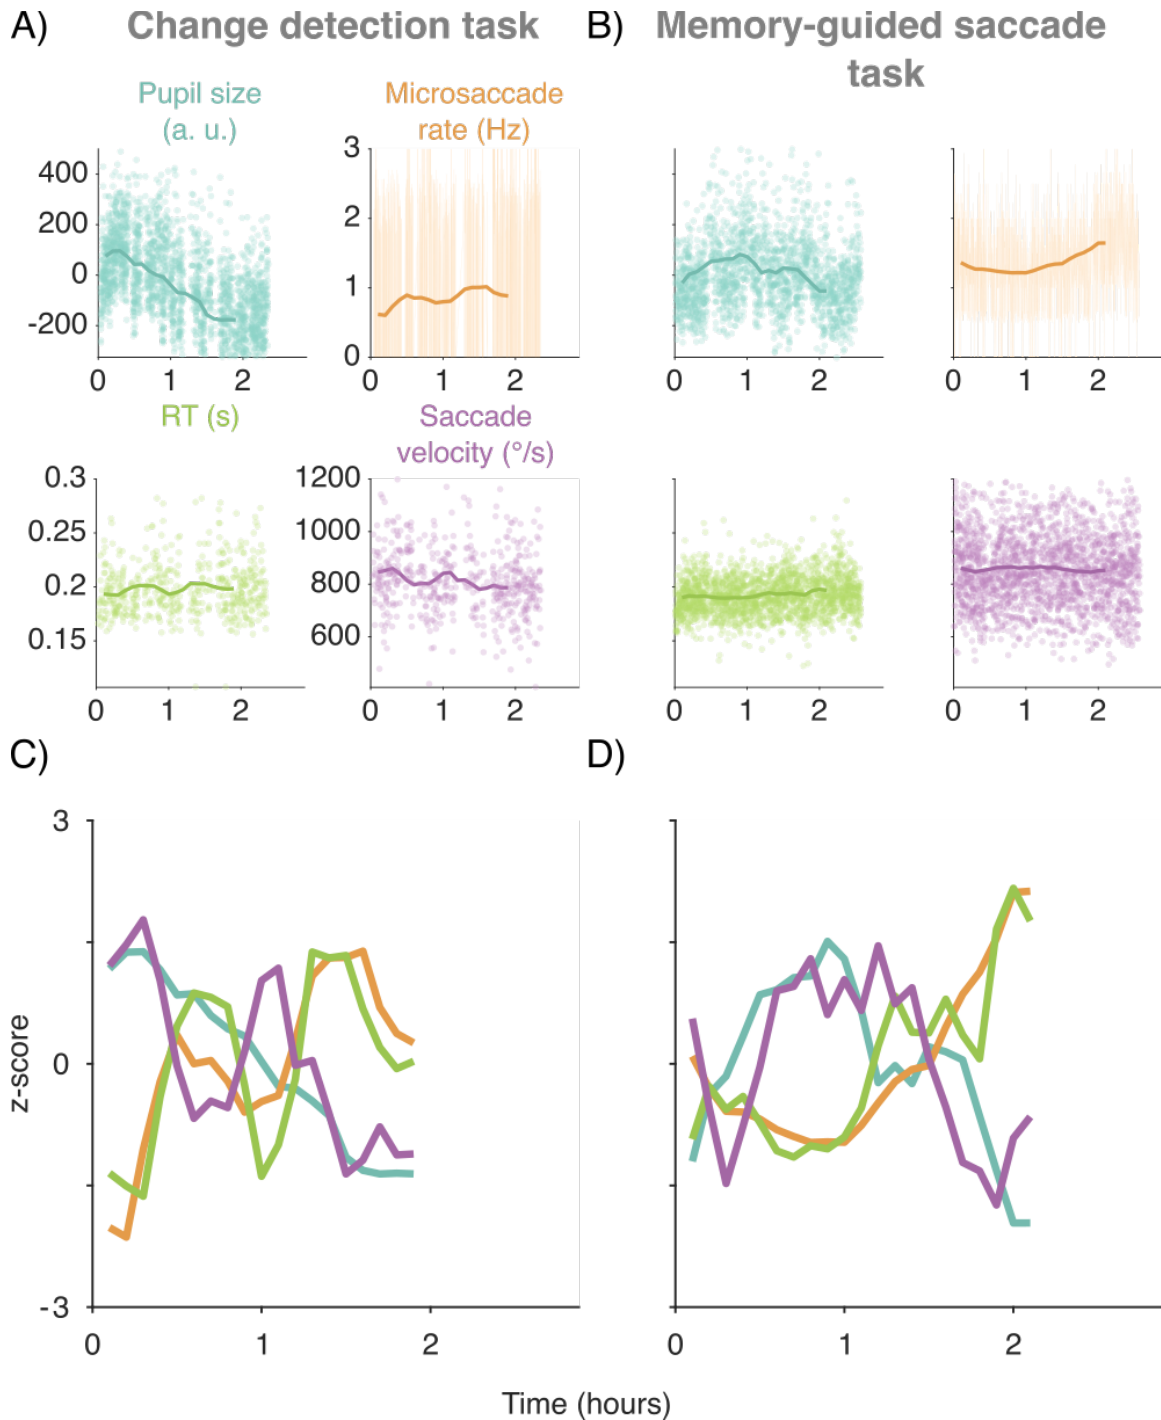

184

185 Figure 2. Isolating slow fluctuations in the eye metrics. (A) Change detection task. Each data point  
186 corresponds to a measurement from a single trial. To isolate slow changes, the data was binned  
187 using a 30-minute sliding window stepped every 6 minutes (solid line) (Cowley et al., 2020). (B)  
188 Same as (A) but for the memory-guided saccade task. Note in (B) and (C) that data points with a  
189 SD  $\sim 3$  times greater than the mean are not shown for illustration purposes. (C) Example session

190 from Monkey 1 on the change detection task. Each metric has been z-scored for illustration  
191 purposes. (D) Example session from the same subject on the memory-guided saccade task.  
192

193         Next, we explored if a similar pattern was found across all sessions and both animals. We  
194 computed correlations (Pearson product-moment correlation coefficient) between all combinations  
195 of the four eye metrics for each session, and compared that distribution of Pearson's  $r$  values to  
196 shuffled distributions using permutation tests (two-sided, difference of medians). Consistent with  
197 the pattern of results observed in several individual sessions (Figure 3 – figure supplement 1 and  
198 Figure 3 – figure supplement 2), we found significant interactions among the four eye metrics.  
199 Pupil size was significantly and negatively correlated with microsaccade rate (median  $r = -0.46$ ;  $p$   
200  $< 0.001$ ) and reaction time (median  $r = -0.18$ ;  $p = 0.020$ ) on the change detection task (Figure 3A  
201 and Figure 3 – figure supplement 1) and memory-guided saccade task (Figure 3B and Figure 3 –  
202 figure supplement 2, median  $r = -0.56$ ;  $p < 0.001$  for microsaccade rate and median  $r = -0.15$ ;  $p =$   
203  $0.011$  for reaction time). We did not observe significant across-session trends in the correlation  
204 between pupil size and saccade velocity (change detection task:  $r = 0.03$ ,  $p = 0.987$ ; memory-  
205 guided saccade task:  $r = 0.09$ ,  $p = 0.523$  in Figure 3A-B), although saccade velocity was itself  
206 correlated with reaction time in both tasks (change detection task:  $r = -0.52$ ,  $p < 0.001$ ; memory-  
207 guided saccade task:  $r = -0.61$ ,  $p < 0.001$ ). In addition, on the change detection task, we found a  
208 significant positive correlation between microsaccade rate and reaction time (median  $r = 0.14$ ;  $p =$   
209  $0.004$ ). Taken together, these results demonstrate that changes in the subjects' arousal level were  
210 accompanied by changes in the action of the eyes. This was true of pupil size, microsaccade rate,  
211 reaction time, and to a lesser extent, saccade velocity, and suggests that these eye metrics may be  
212 used to index global changes in brain state. This motivated us to ask next whether there were neural  
213 correlates of these behavioral signatures.

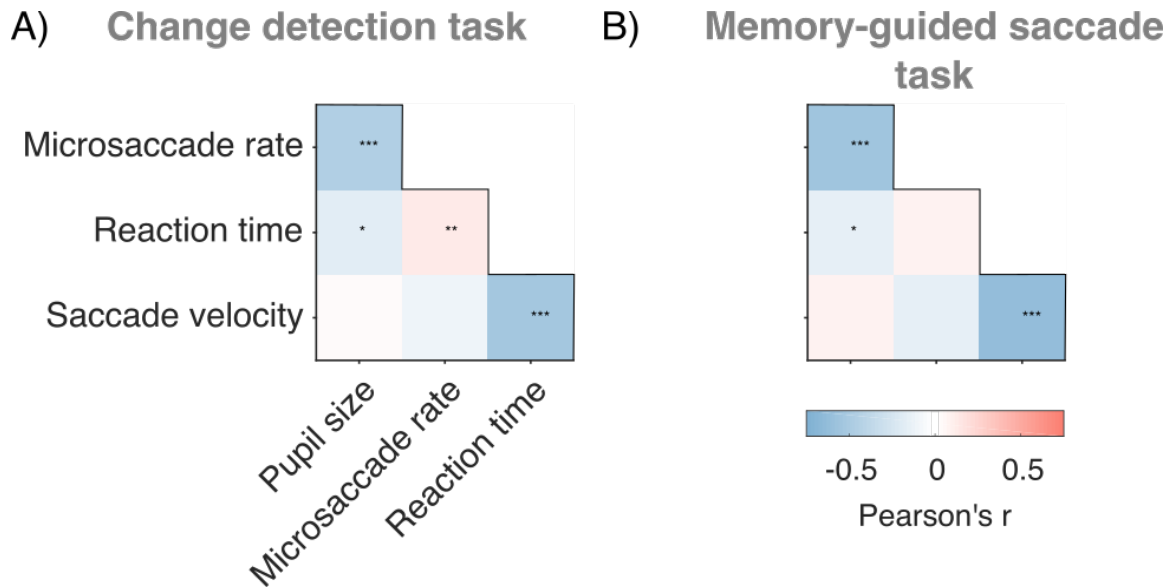

214

215 Figure 3. Correlations between the eye metrics over time. (A) Change detection task. Correlation  
216 matrix showing median r values across sessions between the four eye metrics. (B) Same as (A) but  
217 for the memory-guided saccade task. In (A) and (B) actual distributions of r values were compared  
218 to shuffled distributions using two-sided permutation tests (difference of medians).  $p < 0.05^*$ ,  $p <$   
219  $0.01^{**}$ ,  $p < 0.001^{***}$ .

220 Figure supplement 1. Three example sessions from Monkey 1 and histograms showing actual and  
221 shuffled distributions of r values across sessions on the change detection task.

222 Figure supplement 2. Three example sessions from Monkey 1 and histograms showing actual and  
223 shuffled distributions of r values across sessions on the memory-guided saccade task.

224

### 225 Correlation between the eye metrics and slow drift over time

226 Previously we reported a slow fluctuation in neural activity in V4 and PFC that we termed  
227 'slow drift' (Cowley et al., 2020). We found that this neural signature was related to the subject's  
228 tendency to make impulsive decisions in a change detection task, ignoring sensory evidence (false  
229 alarms). Here, we wanted to investigate if the constellation of eye metrics we observed were  
230 associated with the neural signature of internal state that we termed 'slow drift.' To calculate slow  
231 drift, we binned spike counts in V4 (change detection task) and PFC (memory-guided saccade  
232 task) using the same 30-minute sliding window that had been used to bin the eye metric data

233 (Figure 4A-B, see *Methods*). We then applied principal component analysis (PCA) to the data and  
234 estimated slow drift by projecting the binned residual spike counts along the first principal  
235 component (i.e., the loading vector that explained the most variance in the data). Because the sign  
236 of the loadings in PCA is arbitrary (Jolliffe & Cadima, 2016), the correlation between slow drift  
237 and a given eye metric in any session was equally likely to be positive or negative. This was  
238 problematic since we were interested in whether slow drift was associated with a characteristic  
239 pattern that is indicative of changes in the subjects' arousal level over time i.e., increased pupil  
240 size and saccade velocity, and decreased microsaccade rate and reaction time. In order to establish  
241 consistency across sessions in the sign of the correlations, we constrained the slow drift in each  
242 session to have the same relationship to the spontaneous (change detection task = fixation periods;  
243 memory-guided saccade task = delay periods) and evoked (change detection task = stimulus  
244 periods; memory-guided saccade task = target presentations) activity of the neurons (Figure 4 –  
245 figure supplement 1, and see *Methods*). This served to align slow drift across sessions such that an  
246 increase in the slow drift value was associated with neural activity closer to the evoked pattern of  
247 response (i.e., typically higher firing rates).

248 We computed the slow drift of the neuronal population in each session using this method,  
249 and then compared it to the four eye measures. An example session is shown in Figure 4C-D for  
250 the same subject on the change detection task and the memory-guided saccade task, respectively  
251 (same sessions as in Figure 2). On both tasks, we found a characteristic pattern in which slow drift  
252 was positively associated with pupil diameter and saccade velocity, and negatively associated with  
253 microsaccade rate and reaction time.

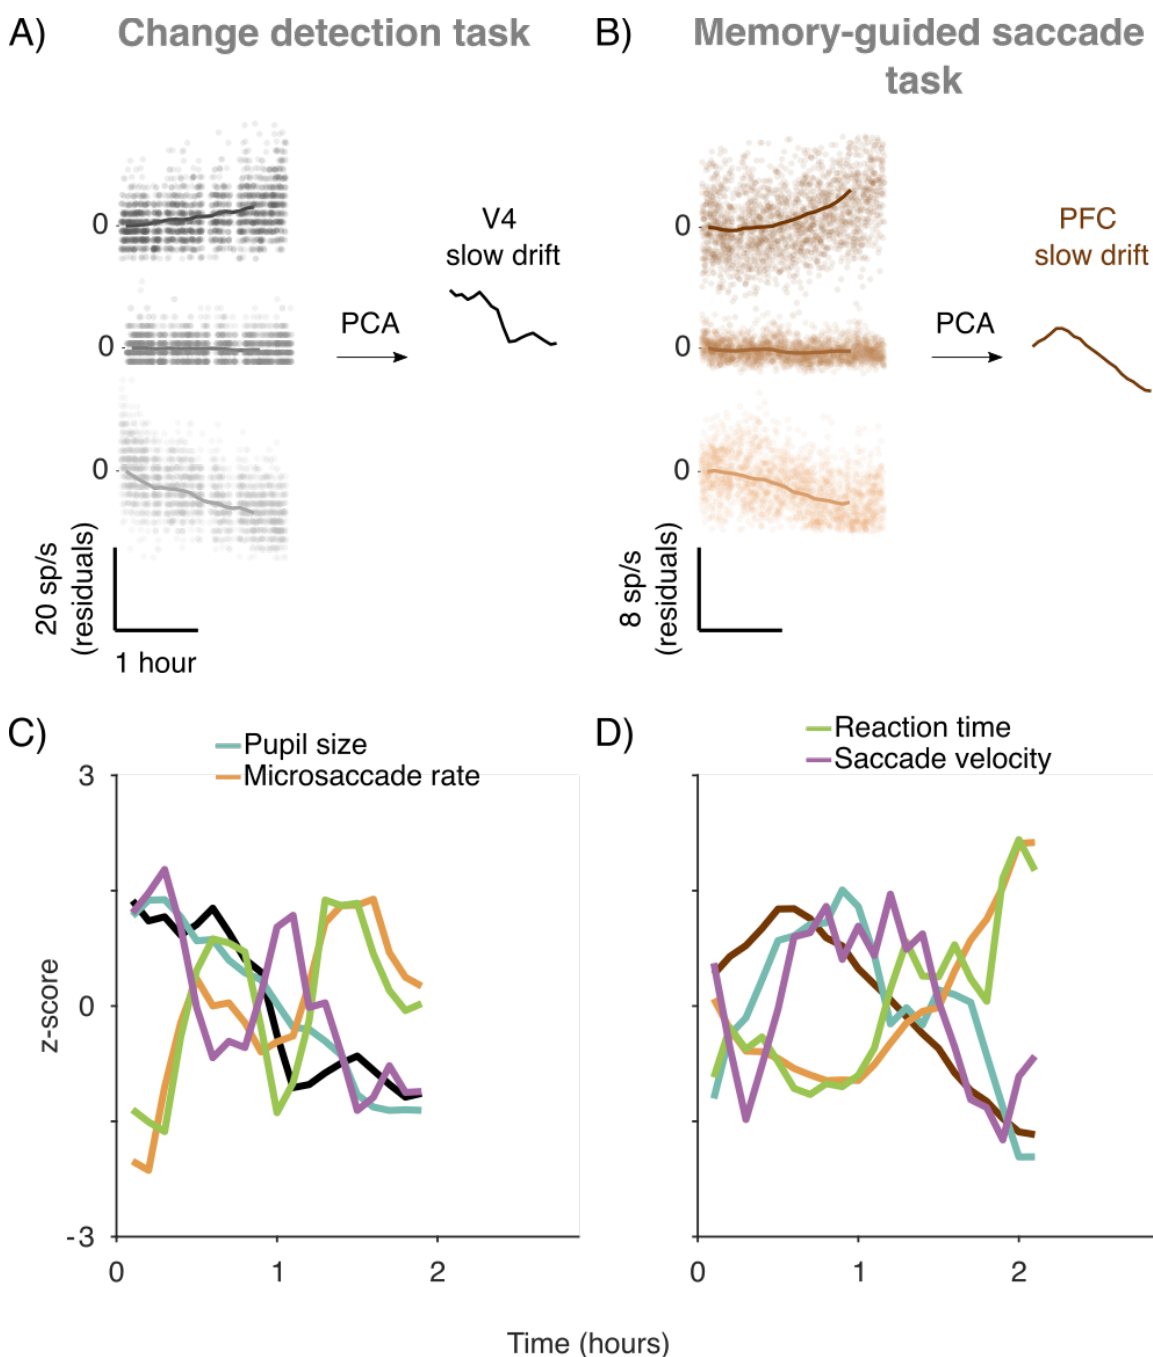

254

255 Figure 4. Calculating slow drift. (A) Change detection task. Three example neurons from a single  
256 session (Monkey 1). Each point represents the mean residual spike count during a 400ms stimulus  
257 period. The data was then binned using a 30-minute sliding window stepped every six minutes  
258 (solid line) so that direct comparisons could be made with the eye metrics. PCA was used to reduce  
259 the dimensionality of the data and slow drift was calculated by projecting binned residual spike  
260 counts along the first principal component. (B) Same as (A) but for the memory-guided saccade  
261 task (same subject). (C) Example session from Monkey 1 on the change detection task. Each metric

262 has been z-scored for illustration purposes. (D) Example session from the same subject on the  
263 memory-guided saccade task.

264 Figure supplement 1. Plots showing how slow drift was aligned across sessions.

265 Figure supplement 2. Example sessions from Monkey 1 on the change detection task and the  
266 memory-guided saccade task.

267 Figure supplement 3. Example sessions from Monkey 2 on the change detection task and the  
268 memory-guided saccade task.

269 Figure supplement 4. Percent waveform variance of four example neurons recorded from Monkey  
270 1 during a single session on the change detection task and the memory-guided saccade task.

271

272

273 Next, we explored if a similar pattern was found across sessions. We computed correlations

274 (Pearson product-moment correlation coefficient) between slow drift and the eye metrics. Actual

275 distributions of  $r$  values were then compared to shuffled distributions using permutation tests (two-

276 sided, difference of medians). Because the slow drift was aligned across sessions based on the

277 neural activity alone and not the behavior, the shuffled distributions are centered on a correlation

278 value of zero. Consistent with the pattern of results observed in several individual sessions (Figure

279 4 – figure supplement 2 and Figure 4 – figure supplement 3), we found that slow drift in V4 on the

280 change detection task (Figure 5A) was positively correlated with pupil diameter (median  $r = 0.46$ ,

281  $p < 0.001$ ) and saccade velocity (median  $r = 0.19$ ,  $p = 0.022$ ), and negatively correlated with

282 microsaccade rate (median  $r = -0.28$ ,  $p = 0.010$ ). While no significant correlation was found

283 between slow drift and reaction time in the data pooled across subjects (median  $r = -0.07$ ;  $p =$

284  $0.572$ ), one subject (Monkey 1) did exhibit a negatively correlation with reaction time (median  $r$

285  $= -0.19$ ,  $p = 0.039$ ). An identical pattern of results was found on the memory-guided saccade task

286 (Figure 5B), where slow drift in PFC was positively correlated with pupil diameter (median  $r =$

287  $0.20$ ;  $p = 0.029$ ) and saccade velocity (median  $r = 0.17$ ,  $p = 0.042$ ), and negatively correlated with

288 microsaccade rate (median  $r = -0.42$ ;  $p < 0.001$ ) and reaction time (median  $r = -0.27$ ;  $p = 0.008$ ).

289 These results show that pupil size, microsaccade rate, reaction time and saccade velocity are

290 associated with slow drift across tasks. Thus, the slow drift was associated with a pattern that is  
291 indicative of changes in the subject's arousal levels over time.

292

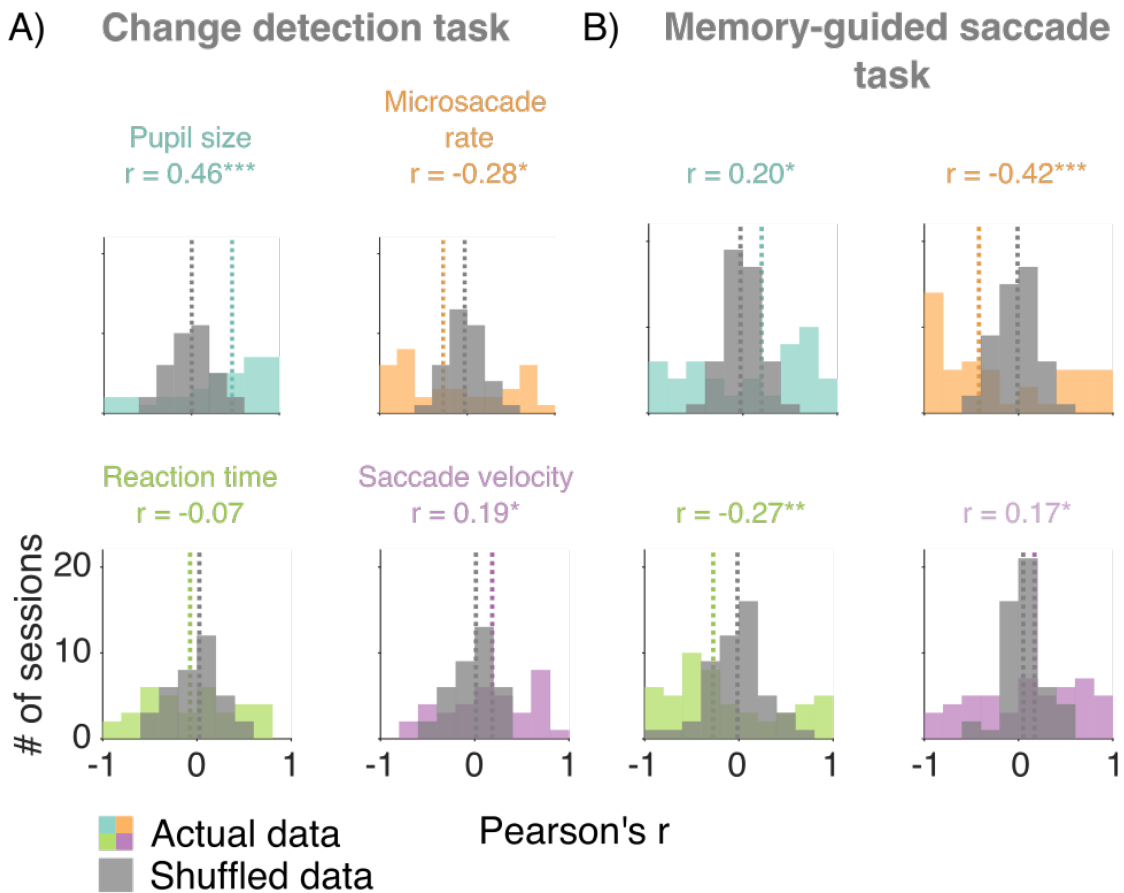

293

294 Figure 5. Correlations between the eye metrics and slow drift over time. (A) Change detection  
295 task. Histograms showing actual and shuffled distributions of r values. (B) Same as (A) but for the  
296 memory-guided saccade task. In (A) and (B) median r values across sessions are indicated by  
297 dashed lines (colored lines = actual data; gray lines = shuffled data). Actual distributions of r values  
298 were compared to shuffled distributions using two-sided permutation tests (difference of medians).  
299  $p < 0.05^*$ ,  $p < 0.01^{**}$ ,  $p < 0.001^{***}$ .

300 Figure supplement 1. Histograms showing actual and shuffled distributions of r values computed  
301 to explore if simultaneously recorded PFC data was associated with the eye metrics on the change  
302 detection task.

303

304

305 Discussion

306           In this study, we investigated if the size of the pupil and the movement of the eyes could  
307 be taken as an external signature of an internal brain state, a low-dimensional neural activity pattern  
308 called slow drift (Cowley et al., 2020). There is strong evidence that internal brain states such as  
309 slow drift can be measured in the population spiking activity of neurons, and that measurements  
310 of the eyes can provide important context into the behavior of subjects on perceptual and decision-  
311 making tasks. Hence, we were keen to determine whether we could directly link a neural measure  
312 of internal brain state acquired from the spiking activity of a population of neurons with external  
313 features of behavior. On two types of perceptual tasks, we found that slow drift was significantly  
314 correlated with a pattern of eye metrics that was indicative of changes in the subjects' arousal level  
315 over time. Our results show that the action of the eyes, be it when they are relatively stable or when  
316 they move, is associated with a latent dimension of neural activity that is pervasive and task-  
317 independent.

318           As described above, decades of research have shown that eye metrics are related to task  
319 performance in a variety of contexts (Di Stasi et al., 2013; Joshi & Gold, 2019; Mathôt, 2018; C.  
320 A. Wang & Munoz, 2015). Heightened levels of arousal have been associated with increased pupil  
321 size and saccade velocity as well as decreased reaction time and microsaccade rate (Castellote et  
322 al., 2007; Deuter et al., 2013; DiGirolamo et al., 2016; Gao et al., 2015; Joshi et al., 2016;  
323 Siegenthaler et al., 2014; Valsecchi et al., 2007; Valsecchi & Turatto, 2009). Given that arousal is  
324 a global phenomenon, one might expect a common pattern across multiple behavioral tasks. In the  
325 present study, we addressed this issue by investigating the relationships between eye metrics on  
326 tasks designed to probe the mechanisms underlying perceptual decision-making (change detection  
327 task) and working memory (memory-guided saccade task). Results showed that pupil size was



328 negatively correlated with microsaccade rate and reaction time on both tasks. Although no  
329 significant correlation was found between pupil size and saccade velocity, the overall pattern of  
330 results suggests that each subject's arousal level was changing over time in a task-independent  
331 manner. These findings support the view that measuring properties related to the eyes can provide  
332 a non-invasive index of global brain states (Di Stasi et al., 2013; Joshi & Gold, 2019; Mathôt,  
333 2018; C. A. Wang & Munoz, 2015). This motivated us to ask if they are also associated with slow  
334 drift.

335         Most studies that have explored the relationship between eye metrics and neural activity  
336 have used single-neuron (spike count, Fano factor) and pairwise statistics ( $r_{sc}$ ). However, numerous  
337 recent studies have shown that rich insight about cognitive processes (e.g., learning, decision-  
338 making, working memory, time perception) can be gained from analysis of the simultaneous  
339 activity of populations of neurons (Harvey, Coen, & Tank, 2012; Mante, Sussillo, Shenoy, &  
340 Newsome, 2013; Murray et al., 2017; Remington, Narain, Hosseini, & Jazayeri, 2018; Sadtler et  
341 al., 2014). In addition, recent work has shown that a low-dimensional representation of neural  
342 activity in the mouse can be used to index global changes in brain state. Stringer et al. (2019)  
343 applied PCA to data recorded from more than 10,000 neurons and found that fluctuations in the  
344 first principal component were significantly associated with whisking, pupil size, and running  
345 speed. In this study, we investigated if slow drift, a dominant mode of neural activity in macaque  
346 cortex is associated with the action of the eyes. On both tasks, we found that it was correlated with  
347 a pattern of eye metrics that is indicative of changes in the subject's arousal level over time. Our  
348 results, coupled with those of Stringer et al. (2019), suggest that much can be learned about global  
349 brain states, as well as cognitive processes, when high-dimensional population activity is reduced  
350 to a low-dimensional subspace (Cunningham & Yu, 2014). A key question for future research is

351 whether latent dimensions of neural activity in the cortex are associated with activity in subcortical  
352 brain regions? One might expect this to be the case given that slow drift was significantly  
353 correlated with pupil size on both tasks.

354 Evidence suggests that pupil size is associated with activity in the LC, a subcortical  
355 structure that regulates arousal by releasing NE in a diverse manner throughout much of the brain  
356 (Aston-Jones & Cohen, 2005; Sara, 2009; van den Brink et al., 2019). That slow drift can be used  
357 to index global brain states suggests that it might be associated with LC activity. Although the LC  
358 is limited in size (~3mm rostrocaudally) and buried deep within the brainstem (German & Bowden,  
359 1975; Sharma et al., 2010), several studies have successfully recorded from single neurons in LC  
360 of the macaque (Aston-Jones, Rajkowski, Kubiak, & Alexinsky, 1994; Clayton, Rajkowski,  
361 Cohen, & Aston-Jones, 2004; Joshi et al., 2016; Kalwani, Joshi, & Gold, 2014; Varazzani et al.,  
362 2015). In addition, LC can be activated using optogenetics (Carter et al., 2010; Hayat et al., 2020;  
363 Li et al., 2016; Quinlan et al., 2019), electrical microstimulation (Joshi et al., 2016; Liu,  
364 Rodenkirch, Moskowitz, Schriver, & Wang, 2017; Reimer et al., 2016), and pharmacological  
365 manipulations (Liu et al., 2017; Vazey & Aston-Jones, 2014). Thus, it should be possible to alter  
366 the course of slow drift in the cortex using some, if not all, of these methods. As well as having a  
367 significant effect on pupil size, our results predict that activating the LC, directly or indirectly,  
368 may lead to task-independent changes in microsaccade rate, reaction time and saccade velocity.

369 Evidence suggests that microsaccades, reaction time and saccade velocity are associated  
370 with neural activity in the SC (Gandhi & Katnani, 2011). This layered structure, located at the roof  
371 of the brain stem, plays a critical role in transforming sensory information into eye movement  
372 commands. Population recordings have been successfully performed in the SC using linear probes  
373 (Massot, Jagadisan, & Gandhi, 2019), and it thus might be possible to identify dominant patterns

374 of neural activity in SC using dimensionality reduction (Cunningham & Yu, 2014). Our results  
375 predict that slow drift in the cortex should be significantly correlated with slow drift in the SC.  
376 However, this might depend upon the mixture of SC neurons in the recorded population. We  
377 previously suggested that slow drift must be removed at some stage before motor commands are  
378 issued to prevent unwanted eye movements (Cowley et al., 2020). Thus, one might not expect a  
379 correlation between slow drift in the cortex and slow drift in deep-layer SC neurons that fire  
380 vigorously prior to the execution of a saccade, and relay motor commands to downstream nuclei  
381 innervating the oculomotor muscles (Sparks & Hartwich-Young, 1989). An alternative possibility  
382 is that slow drift is not removed, but instead occupies an orthogonal subspace in the SC that is not  
383 read out by downstream nuclei. This is not beyond the realm of possibility given that an identical  
384 scheme appears to exist in the skeletomotor system to stop preparatory signals reaching the  
385 muscles (Ames & Churchland, 2019; Elsayed, Lara, Kaufman, Churchland, & Cunningham, 2016;  
386 Kaufman, Churchland, Ryu, & Shenoy, 2014; Stavisky, Kao, Ryu, & Shenoy, 2017). Further  
387 research is needed to disentangle these possibilities.

388         Studies in the fields of psychology and neuroscience have mainly used pupil size to index  
389 arousal, but metrics such as heart rate (HR) and galvanic skin response (GSR) are also associated  
390 with global brain states. For example, Wang et al. (2018) measured pupil size, HR and GSR while  
391 human subjects viewed emotional face stimuli specifically designed to evoke fluctuations in  
392 arousal. Results showed that all three metrics were positively correlated prior to the presentation  
393 of the stimuli. That is, when pupil size was large, and the subjects were in heightened state of  
394 arousal, HR and GSR increased. In addition, it has been suggested that pre-stimulus oscillations in  
395 the alpha band can be used to index global brain states as they are inversely related to performance  
396 on visual detection tasks. Several studies using electroencephalography (EEG) have shown that

397 the probability of detecting near-threshold stimuli increases when pre-stimulus power in the alpha  
398 band is low (Benwell et al., 2017; Samaha, Iemi, & Postle, 2017; Van Dijk, Schoffelen,  
399 Oostenveld, & Jensen, 2008). Simultaneous recordings of spiking activity and EEG in awake  
400 behaving monkeys are rare. However, our results predict that slow drift should be associated with  
401 pre-stimulus alpha oscillations.

402 Research has also uncovered a link between alpha oscillations and microsaccades (Bellet,  
403 Chen, & Haged, 2017). This effect has been attributed to changes in spatial attention, which have  
404 a profound effect on microsaccade direction. For example, Lowet et al. (2018) found that attention-  
405 related modulation of spiking responses, Fano factor and  $r_{sc}$  only occur following a microsaccade  
406 in the direction of an attended stimulus. In the present study, we found that slow drift was  
407 significantly correlated with microsaccade rate on both tasks. This is unlikely to be explained by  
408 changes in spatial attention as both Cowley et al. (2020) and Rabinowitz et al. (2015) found that  
409 slow drift on a change detection task was not associated with the blocks of trials used to cue spatial  
410 attention inside and outside the RF. In addition, the correlation between slow drift and  
411 microsaccade rate in the present study was lower on the change detection task ( $r = -0.27$ ) than the  
412 memory-guided saccade task ( $r = -0.37$ ). One would not have expected this to be the case if slow  
413 drift was mediated by changes in spatial attention. These results raise the possibility that spatial  
414 attention and arousal have differential effects on microsaccades. Attention might specifically affect  
415 microsaccade direction, whereas arousal might affect microsaccade rate irrespective of direction.  
416 Further research is needed to test this hypothesis.

417 In summary, we investigated if properties related to the eyes are associated with slow drift:  
418 a low-dimensional pattern of neural activity that was recently identified in the macaque cortex by  
419 Cowley et al. (2020). On both tasks, we found that slow drift was significantly associated with a

420 pattern of eye metrics that is indicative of changes in the subjects' arousal level over time. These  
421 results demonstrate that the collective action of the eyes is associated with a latent dimension of  
422 neural activity that is pervasive and task-independent. They suggest that slow drift can be used to  
423 index global changes in brain state over time. Further research is necessary to determine the origins  
424 of this slow drift in population activity. A key question for future work will be to determine the  
425 mechanisms by which slow drift influences behavior in some instances (e.g., when arousal level  
426 drives an urgent response) and is circumvented in others (e.g., when an accurate perceptual  
427 judgement must be made regardless of arousal level).

## 428 Methods

### 429 Subjects

430 Two adult rhesus macaque monkeys (*Macaca mulatta*) were used in this study. Surgical  
431 procedures to chronically implant a titanium head post (to immobilize the subjects' head during  
432 experiments) and microelectrode arrays were conducted in aseptic conditions under isoflurane  
433 anesthesia, as described in detail by Smith and Sommer (2013). Opiate analgesics were used to  
434 minimize pain and discomfort during the perioperative period. Neural activity was recorded using  
435 100-channel "Utah" arrays (Blackrock Microsystems) in V4 (Monkey 1 = right hemisphere;  
436 Monkey 2 = left hemisphere) and PFC (Monkey 1 = right hemisphere; Monkey 2 = left  
437 hemisphere) while the subjects performed the change detection task (Figure 1A). Note that this is  
438 the same dataset used by Snyder et al. (2018) and Cowley et al. (2020). On the memory-guided  
439 saccade task (Figure 1B), neural activity was only recorded in PFC (Monkey 1 = left hemisphere;  
440 Monkey 2 = left hemisphere). Note that the data presented here are a superset of the data presented  
441 in Khanna et al. (2019). The only difference between the memory-guided saccade data presented  
442 here and that previous study is that here we also analyzed neural activity from additional sessions

443 in Monkey 1 after a new array was implanted in left PFC. The sessions were also longer, and  
444 particularly well suited to analyze slow fluctuations in neural activity. The arrays comprised a  
445 10x10 grid of silicon microelectrodes (1 mm in length) spaced 400  $\mu\text{m}$  apart. Experimental  
446 procedures were approved by the Institutional Animal Care and Use Committee of the University  
447 of Pittsburgh and were performed in accordance with the United States National Research  
448 Council's Guide for the Care and Use of Laboratory Animals.

#### 449 Microelectrode array recordings

450 Signals from each microelectrode in the array were amplified and band-pass filtered (0.3–  
451 7500 Hz) by a Grapevine system (Ripple). Waveform segments crossing a threshold (set as a  
452 multiple of the root mean square noise on each channel) were digitized (30KHz) and stored for  
453 offline analysis and sorting. First, waveforms were automatically sorted using a competitive  
454 mixture decomposition method (Shoham, Fellows, & Normann, 2003). They were then manually  
455 refined using custom time amplitude window discrimination software ((Kelly et al., 2007), code  
456 available at <https://github.com/smithlabvision/spikesort>), which takes into account metrics  
457 including (but not limited to) waveform shape and the distribution of interspike intervals. A  
458 mixture of single and multiunit activity was recorded, but we refer here to all units as “neurons”.  
459 On the change detection task, the mean number of V4 neurons across sessions was 70 (SD = 11)  
460 for Monkey 1 and 31 (SD = 16) for Monkey 2, whereas the mean number of PFC neurons across  
461 sessions was 84 (SD = 15) for Monkey 1 and 90 (SD = 20) for Monkey 2. On the memory-guided  
462 saccade task, the mean number of PFC neurons across sessions was 54 (SD = 11) for Monkey 1  
463 and 38 (SD = 19) for Monkey 2.

#### 464 Visual stimuli

465 Visual stimuli were generated using a combination of custom software written in  
466 MATLAB (The MathWorks) and Psychophysics Toolbox extensions (Brainard, 1997; Pelli, 1997;  
467 Kleiner et al., 2007). They were displayed on a CRT monitor (resolution = 1024 X 768 pixels;  
468 refresh rate = 100Hz), which was viewed at a distance of 36cm and gamma-corrected to linearize  
469 the relationship between input voltage and output luminance using a photometer and look-up-  
470 tables.

#### 471 Behavioral tasks

##### 472 Orientation-change detection task

473 Subjects fixated a central point (diameter =  $0.6^\circ$ ) on the monitor to initiate a trial (Figure  
474 1A). Each trial comprised a sequence of stimulus periods (400ms) separated by fixation periods  
475 (duration drawn at random from a uniform distribution spanning 300-500ms). The 400ms stimulus  
476 periods comprised pairs of drifting full-contrast Gabor stimuli. One stimulus was presented in the  
477 aggregate receptive field (RF) of the recorded V4 neurons, whereas the other stimulus was  
478 presented in the mirror-symmetric location in the opposite hemifield. Although the spatial  
479 (Monkey 1 =  $0.85\text{cycles}/^\circ$ ; Monkey 2 =  $0.85\text{cycles}/^\circ$ ) and temporal frequencies (Monkey 1 =  
480  $8\text{cycles/s}$ ; Monkey 2 =  $7\text{cycles/s}$ ) of the stimuli were not optimized for each individual V4 neuron  
481 they did evoke a strong response from the population. The orientation of the stimulus in the  
482 aggregate RF was chosen at random to be  $45$  or  $135^\circ$ , and the stimulus in the opposite hemifield  
483 was assigned the other orientation. There was a fixed probability (Monkey 1 = 30%; Monkey 2 =  
484 40%) that one of the Gabors would change orientation by  $\pm 1$ ,  $\pm 3$ ,  $\pm 6$ , or  $\pm 15^\circ$  on each stimulus  
485 presentation. The sequence continued until the subject) made a saccade to the changed stimulus  
486 within 700ms (“hit”); 2) made a saccade to an unchanged stimulus (“false alarm”); or 3) remained  
487 fixating for more than 700ms after a change occurred (“miss”). If the subject correctly detected an

488 orientation change, they received a liquid reward. In contrast, a time-out occurred if the subject  
489 made a saccade to an unchanged stimulus delaying the beginning of the next trial by 1s. It is  
490 important to note that the effects of spatial attention were also investigated (although not analyzed  
491 in this study) by cueing blocks of trials such that the orientation change was 90% more likely to  
492 occur within the aggregate V4 RF than the opposite hemifield.

### 493 Memory-guided saccade task

494 Subjects fixated a central point (diameter =  $0.6^\circ$ ) on the monitor to initiate a trial (Figure  
495 1B). After fixating within a circular window (diameter =  $2.4^\circ$  and  $1.8^\circ$  for Monkey 1 and Monkey  
496 2, respectively) for 200ms, a target stimulus (diameter =  $0.8^\circ$ ) was presented for 50ms (except for  
497 1 session in which it was presented for 400ms). The target stimulus appeared at 1 of 8 angles  
498 separated by  $45^\circ$ , and 1 of 5 eccentricities, yielding 40 conditions in total. After the target stimulus  
499 had been presented, subjects were required to maintain fixation for a delay period. For Monkey 1,  
500 the duration of the delay period was either 1) drawn at random from a distribution spanning 1200-  
501 3750ms; or 2) fixed at 1400 or 2000ms. For Monkey 2, the duration of the delay period was 500ms.  
502 If steady fixation was maintained throughout the delay period, the central point was extinguished  
503 prompting the subjects to make a saccade to the remembered target location. The subjects had  
504 500ms to initiate a saccade. Once the saccade had been initiated, they had a further 200ms to reach  
505 the remembered target location. To receive a liquid reward, the subjects' gaze had to be maintained  
506 within a circular window centered on the target location (diameter =  $4$  and  $2.7^\circ$  for Monkey 1 and  
507 Monkey 2, respectively) for 150 ms. In a subset of sessions, the target was briefly reilluminated,  
508 after the fixation point was extinguished and the saccade had been initiated, to aid in saccade  
509 completion.

### 510 Eye tracking



511 Eye position and pupil diameter were recorded monocularly at a rate of 1000Hz using an  
512 infrared eye tracker (EyeLink 1000, SR Research).

### 513 Microsaccade detection

514 Microsaccades were defined as eye movements that exceeded a velocity threshold of 6  
515 times the standard deviation of the median velocity for at least 6ms (Engbert & Kliegl, 2003). They  
516 were required to be separated in time by at least 100ms. In addition, we removed microsaccades  
517 with an amplitude greater than 1° and a velocity greater than 100°/s. To assess the validity of our  
518 microsaccade detection method, the correlation (Pearson product-moment correlation coefficient)  
519 between the amplitude and peak velocity of detected microsaccades (i.e., the main sequence) was  
520 computed for each session (Figure 1 – figure supplement 1). The mean correlation between  
521 microsaccade amplitude and peak microsaccade velocity across sessions was 0.86 (SD = 0.07) for  
522 the change detection task and 0.83 (SD = 0.04) for the memory-guide saccade task. These findings  
523 indicate that our microsaccade detection algorithm was robust (Zuber, Stark, & Cook, 1965).

### 524 Eye metrics

#### 525 Change detection task

526 Mean pupil diameter was measured during stimulus periods, whereas microsaccade rate  
527 was measured during fixation periods (Figure 1C). We did not include the first fixation period  
528 when measuring microsaccade rate in the change-detection task. As can be seen in Figure 1C, there  
529 was an increase in eye position variability during this period resulting from fixation having been  
530 established a short time earlier (300-500ms). Such variability was not present in proceeding  
531 fixation periods. Reaction time and saccade velocity were measured on trials in which the subjects  
532 were rewarded for correctly detected an orientation change. Reaction time was defined as the time  
533 from when the change occurred to the time at which the saccade exceeded a velocity threshold of

534 100°/s. Saccade velocity was the peak velocity of the saccade to the changed stimulus. To isolate  
535 slow changes in the eye metrics over time the data for each session was binned using a 30-minute  
536 sliding window stepped every 6 minutes (Figure 2A).

#### 537 Memory-guided saccade task.

538 Pupil size, microsaccade rate, reaction time and saccade velocity were measured on trials  
539 in which the subjects received a liquid reward for making a correct saccade to the remembered  
540 target location. Mean pupil diameter was measured during the presentation of the target stimulus,  
541 whereas microsaccade rate was measured during the delay period (Figure 1D). Reaction time was  
542 defined as the time from when the fixation point was extinguished to the time at which the saccade  
543 reached a threshold of 100 °/s. Saccade velocity was the peak of velocity of the saccade to the  
544 remembered target location. As in the change-detection task, the data for each session was binned  
545 using a 30-minute sliding window stepped every 6 minutes (Figure 2B).

#### 546 Calculating slow drift

#### 547 Orientation-change detection task

548 The spiking responses of populations of neurons in V4 were measured during a 400ms  
549 period that began 50ms after stimulus presentation (Figure 4A). To control for the fact that some  
550 neurons had a preference for one orientation (45 or 135°) over the other residual spike counts were  
551 calculated. We subtracted the mean response for a given orientation across the entire session from  
552 individual responses to that orientation. To isolate slow changes in neural activity over time,  
553 residual spike counts for each V4 neuron were binned using a 30-minute sliding window stepped  
554 every 6 minutes (Cowley et al., 2020). PCA was then performed to reduce the high-dimensional  
555 residual data to a smaller number of variables (Cunningham & Yu, 2014). Slow drift in V4 was  
556 estimated by projecting the binned residual spike counts for each neuron along the first principal

557 component (Cowley et al., 2020). As described above, the spiking responses of neurons in PFC  
558 were simultaneously recorded on the change detection task. When PFC slow drift was calculated  
559 using the method described above, we found it to be significantly associated with V4 slow drift  
560 (median  $r = 0.95$ ,  $p < 0.001$ ), consistent with previous results (Cowley et al., 2020). On the change  
561 detection task, we investigated the relationships between the eye metrics and V4 slow drift.  
562 However, a very similar pattern of results was found when slow drift was calculated using  
563 simultaneously recorded PFC data (Figure 5 – figure supplement 1).

#### 564 Memory-guided saccade task

565 The spiking responses of populations of neurons in PFC were measured during the delay  
566 period (Figure 4B). To control for the fact that some neurons had a preference for one target  
567 location over another, residual spike counts were calculated. We subtracted the mean response to  
568 a given target location across the entire session from individual responses to that location. To  
569 isolate slow changes in neural activity over time residual spike counts for each PFC neuron were  
570 binned using a 30-minute sliding window stepped every 6 minutes. PCA was then performed, and  
571 slow drift was estimated by projecting the binned residual spike counts for each neuron along the  
572 first principal component.

#### 573 Controlling for neural recording instabilities

574 To rule out the possibility that slow drift arose due to recording instabilities (e.g., the  
575 distance between the neuron and the microelectrodes changing slowly over time) we only included  
576 neurons with stable waveform shapes throughout a session. This was quantified by calculating  
577 percent waveform variance for each neuron (Figure 4 – figure supplement 4). First, the session  
578 was divided into 10 non-overlapping time bins. A residual waveform was then computed for each  
579 time bin by subtracting the mean waveform across time bins. The variance of each residual

580 waveform was divided by the variance of the mean waveform across time bins yielding 10 values  
581 (one of reach time bin). Percent waveform variance was defined as the maximum value across time  
582 bins. Neurons with a percent waveform variance greater than 10% were deemed as having unstable  
583 waveform shapes throughout a session. They were excluded from all analyses, consistent with  
584 previous research (Cowley et al., 2020).

#### 585 Aligning slow drift across sessions

586 As described above, slow drift was calculated by projecting binned residual spike counts  
587 along the first principal component (Cowley et al., 2020). The weights in a PCA can be positive  
588 or negative (Jolliffe & Cadima, 2016), which meant the sign of the correlation between slow drift  
589 and a given eye metric was arbitrary. Preserving the sign of the correlations was particularly  
590 important in this study because we were interested in whether slow drift was associated with a  
591 pattern that is indicative of changes in the subjects' arousal levels over time i.e., increased pupil  
592 size and saccade velocity, and decreased microsaccade rate and reaction time. Thus, we had to  
593 devise a method to align slow drift across sessions. As expected, the mean evoked population  
594 response calculated during stimulus periods on the change detection task was significantly higher  
595 than the mean spontaneous population response calculated during fixation periods (Figure 4 –  
596 figure supplement 1). Similarly, on the memory-guided saccade task, the mean evoked population  
597 response calculated during target presentations was significantly higher than the mean spontaneous  
598 population response calculated during delay periods. To align slow drift for each individual  
599 session, we projected evoked and spontaneous responses onto the first principal component. The  
600 sign of the slow drift was flipped if the mean projection value for the evoked responses was less  
601 than that for the spontaneous responses – i.e., if the relationship described above for unprojected  
602 data did not hold true.

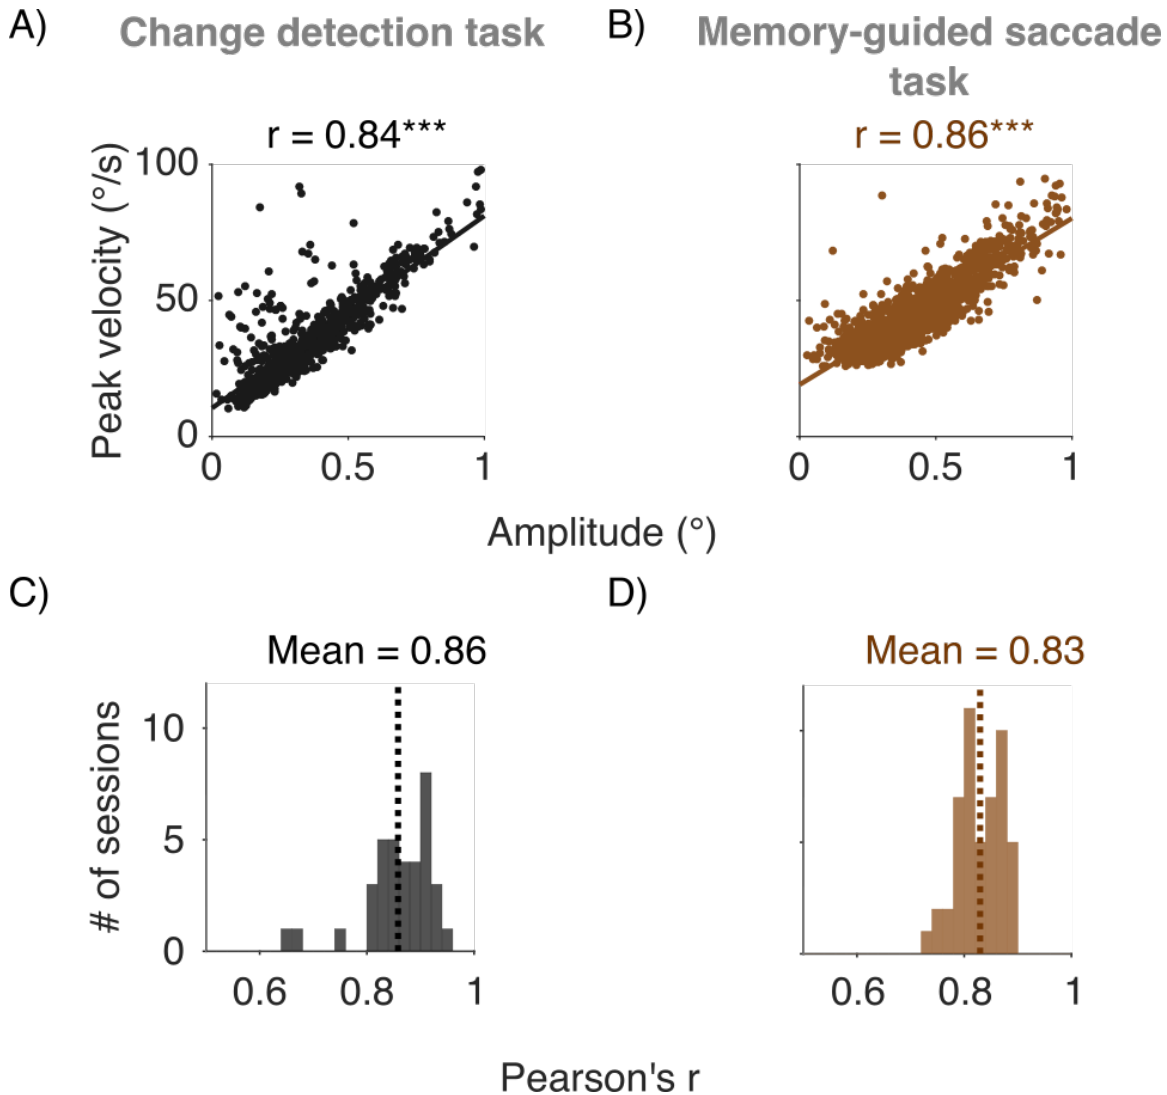

603

604 Figure 1 – figure supplement 1. Assessing the validity of our microsaccade detection algorithm.  
605 The correlation between the amplitude and peak velocity of detected microsaccades was computed  
606 for each session. (A) Change detection task. Scatter plot showing the relationship between  
607 microsaccade amplitude and peak velocity for an example session on the change detection task.  
608 (B) Same as (A) but for the memory-guided saccade task (same subject). (C) Histogram showing  
609 the distribution of r values for the change detection task. (D) Same as (C) but for the memory-  
610 guided saccade task. In (C) and (D) dashed lines indicate the mean r value across sessions. On both  
611 tasks, the mean correlation between microsaccade amplitude and peak velocity was strong,  
612 indicating that our method of detecting microsaccades was robust (Zuber et al., 1965).  $p < 0.05^*$ ,  
613  $p < 0.01^{**}$ ,  $p < 0.001^{***}$ .

614

615

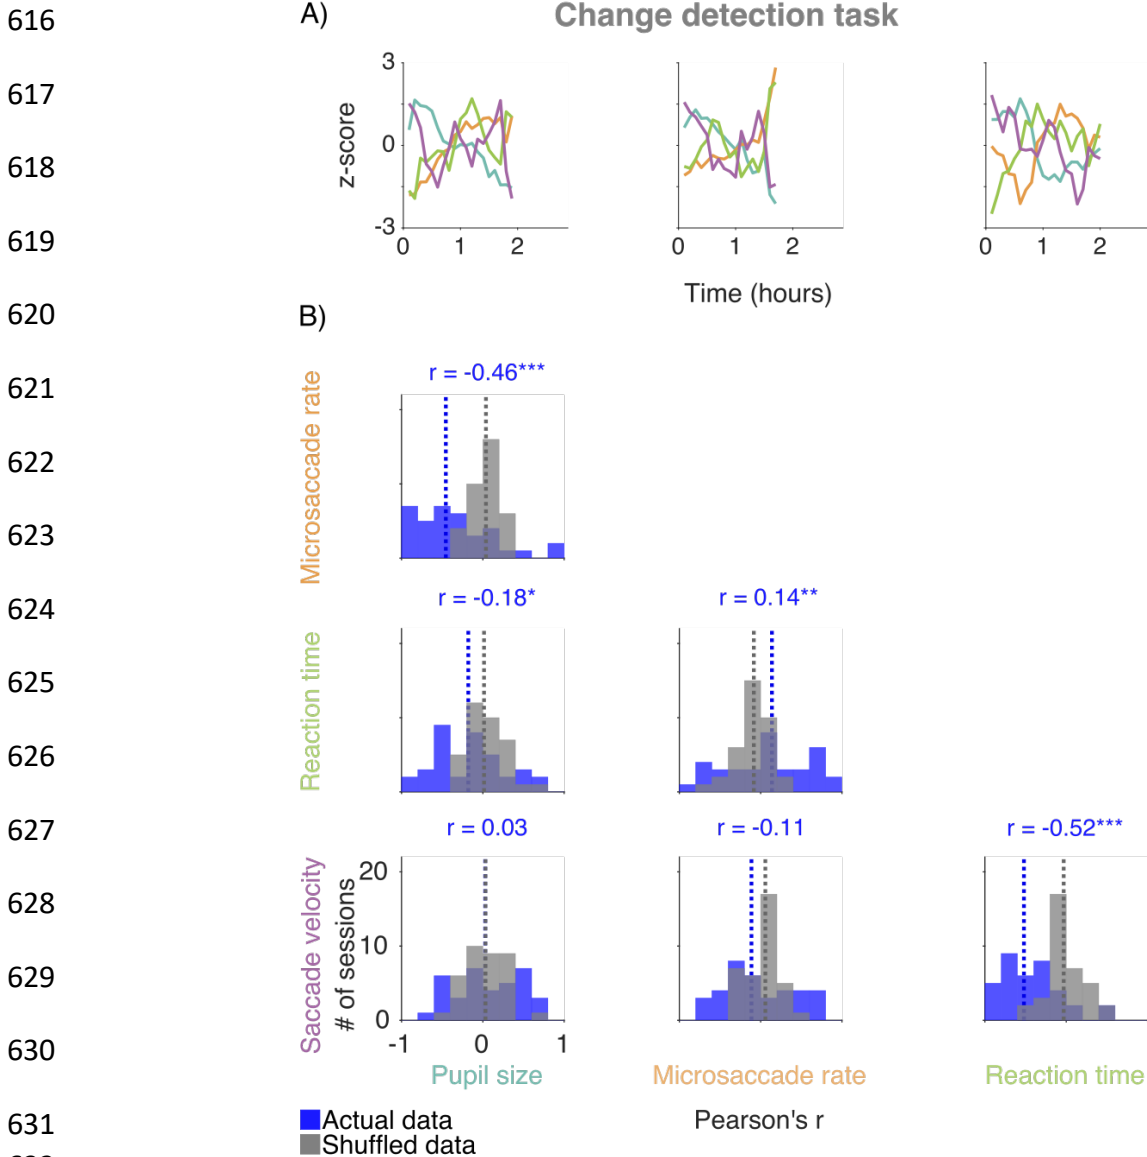

634 Figure 3 - figure supplement 1. Correlations between the eye metrics on the change detection task.  
635 (A) Three example sessions from Monkey 1. (B) Histograms showing actual and shuffled  
636 distributions of r values across sessions. Median r values are indicated by dashed lines (blue lines  
637 = actual data; gray lines = shuffled data). Actual distributions of r values were compared to shuffled  
638 distributions using two-sided permutation tests (difference of medians).  $p < 0.05^*$ ,  $p < 0.01^{**}$ ,  $p$   
639  $< 0.001^{***}$ .

640

641

642

643  
644  
645  
646  
647  
648  
649  
650  
651  
652  
653  
654  
655  
656  
657  
658  
659  
660  
661  
662  
663  
664  
665  
666  
667  
668  
669  
670

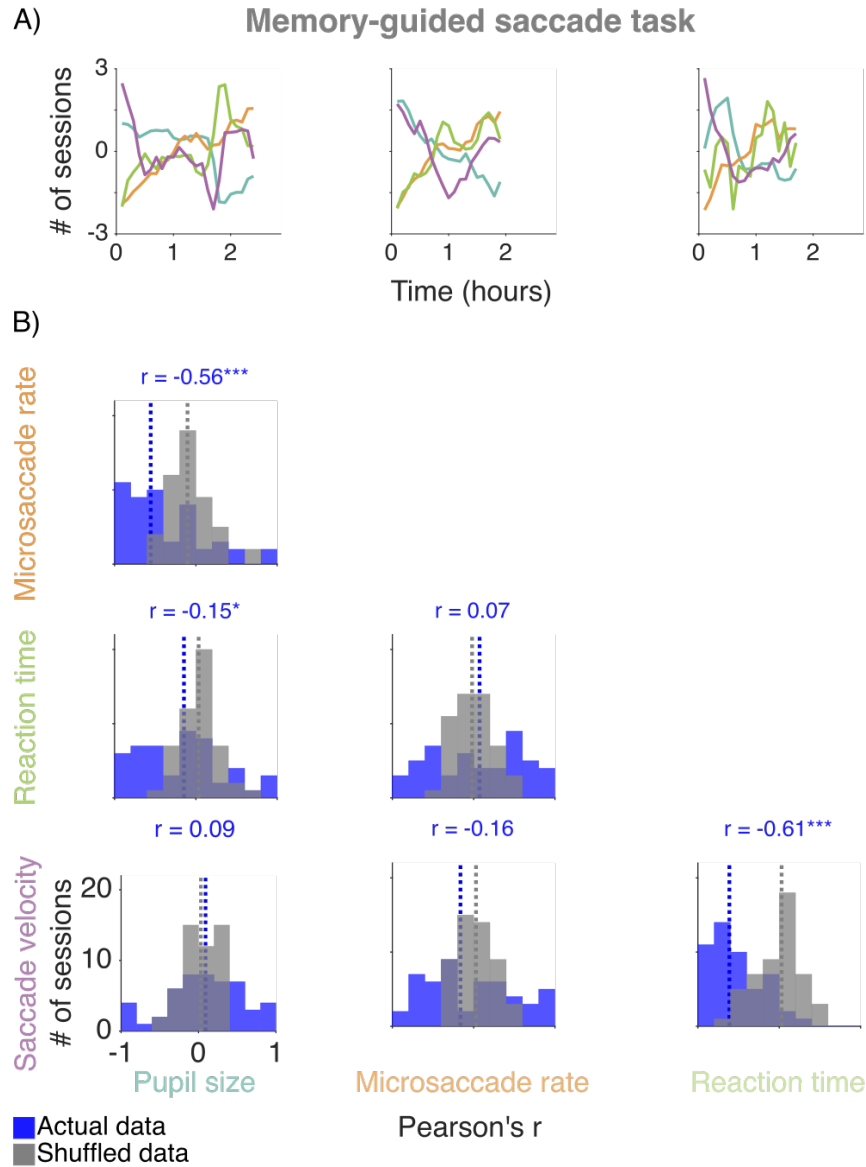

Figure 3 - figure supplement 2. Correlations between the eye metrics on the memory-guided saccade task. (A) Three example sessions from Monkey 1. (B) Histograms showing actual and shuffled distributions of r values. Median r values are indicated by dashed lines (blue lines = actual data; gray lines = shuffled data). Actual distributions of r values were compared to shuffled distributions using two-sided permutation tests (difference of medians).  $p < 0.05^*$ ,  $p < 0.01^{**}$ ,  $p < 0.001^{***}$ .

671  
672  
673  
674  
675  
676  
677  
678  
679  
680  
681  
682  
683  
684  
685  
686  
687  
688  
689

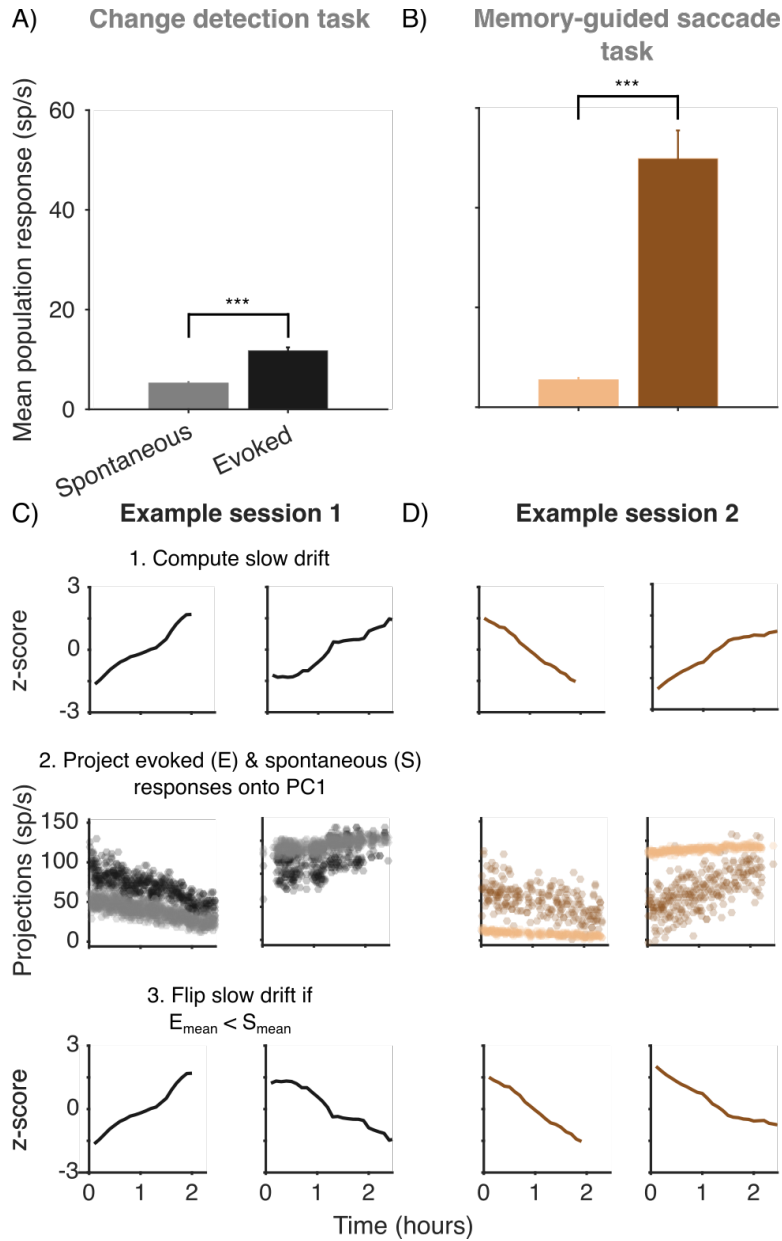

690 Figure 4 - figure supplement 1. Aligning slow drift across sessions. (A) Bar charts showing the  
691 mean spontaneous and evoked population response across sessions on the change detection task.  
692 Spontaneous activity was calculated during fixation periods, whereas evoked activity was  
693 calculated during stimulus periods. (B) Same as (A) but for the memory-guided saccade task.  
694 Spontaneous activity was recorded during the delay period, whereas evoked activity was recorded  
695 during the presentation of the target stimulus. In (A) and (B) the mean evoked population response  
696 was significantly higher for evoked than spontaneous activity (two-sided permutation tests,  
697 difference of means). (C) For each session, slow drift on the change detection task was aligned by  
698 projecting evoked and spontaneous responses onto the first principal component. The sign of the  
699 slow drift was flipped if the mean projection value for the evoked responses was less than that for



700 the spontaneous responses i.e., if the relationship shown in (A) for unprojected data did not hold  
701 true. (D) Same as (C) but for the memory-guided saccade task.  $p < 0.05^*$ ,  $p < 0.01^{**}$ ,  $p < 0.001^{***}$ .  
702 Error bars represent  $\pm 1$  SEM.

703

704

705

706

707

708

709

710

711

712

713

714

715

716

717

718

719

720

721

722

723

724

725

726

727

728

729

730

731  
732  
733  
734  
735  
736  
737  
738  
739  
740  
741  
742  
743  
744  
745  
746  
747  
748  
749  
750  
751  
752  
753  
754  
755  
756  
757  
758  
759  
760  
761

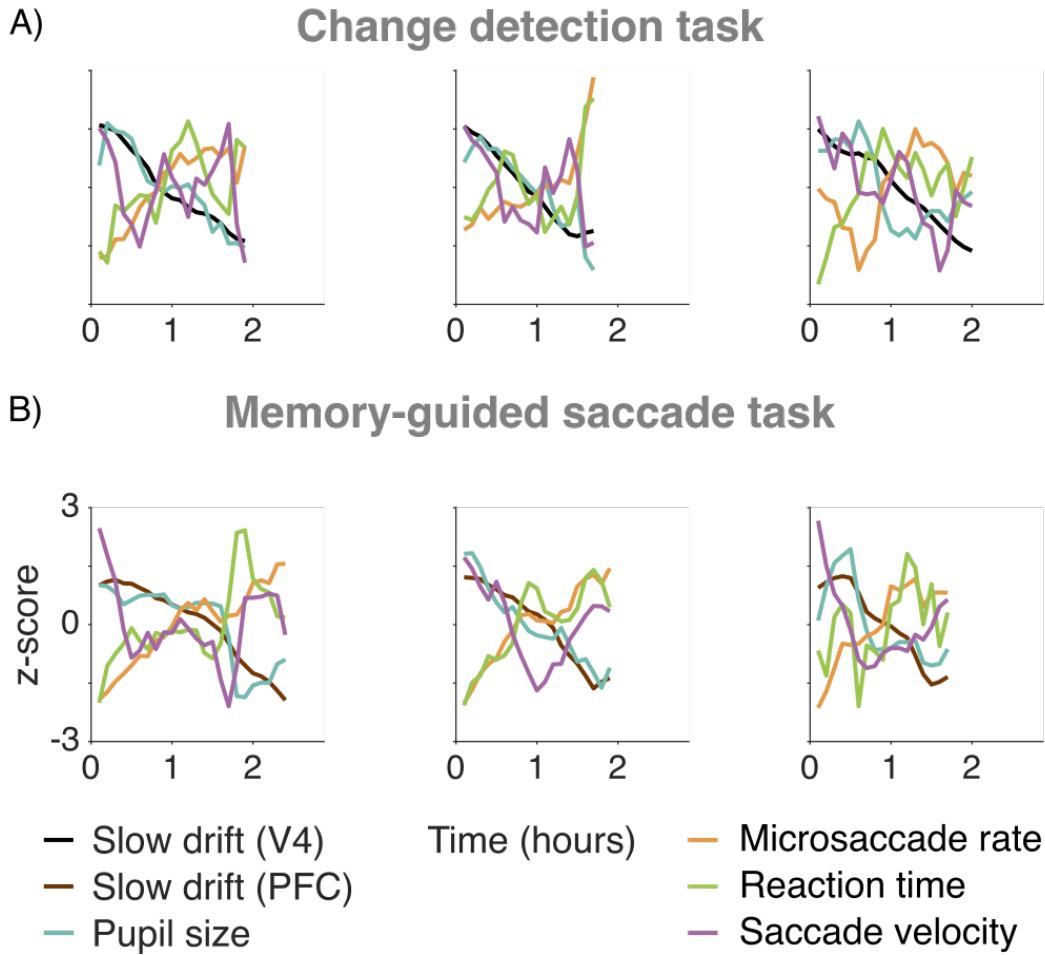

Figure 4 - figure supplement 2. Correlations between slow drift and the eye metrics. (A) Three example sessions from Monkey 1 on the change detection task. (B) Same as (A) but for the memory-guided saccade task (same subject).

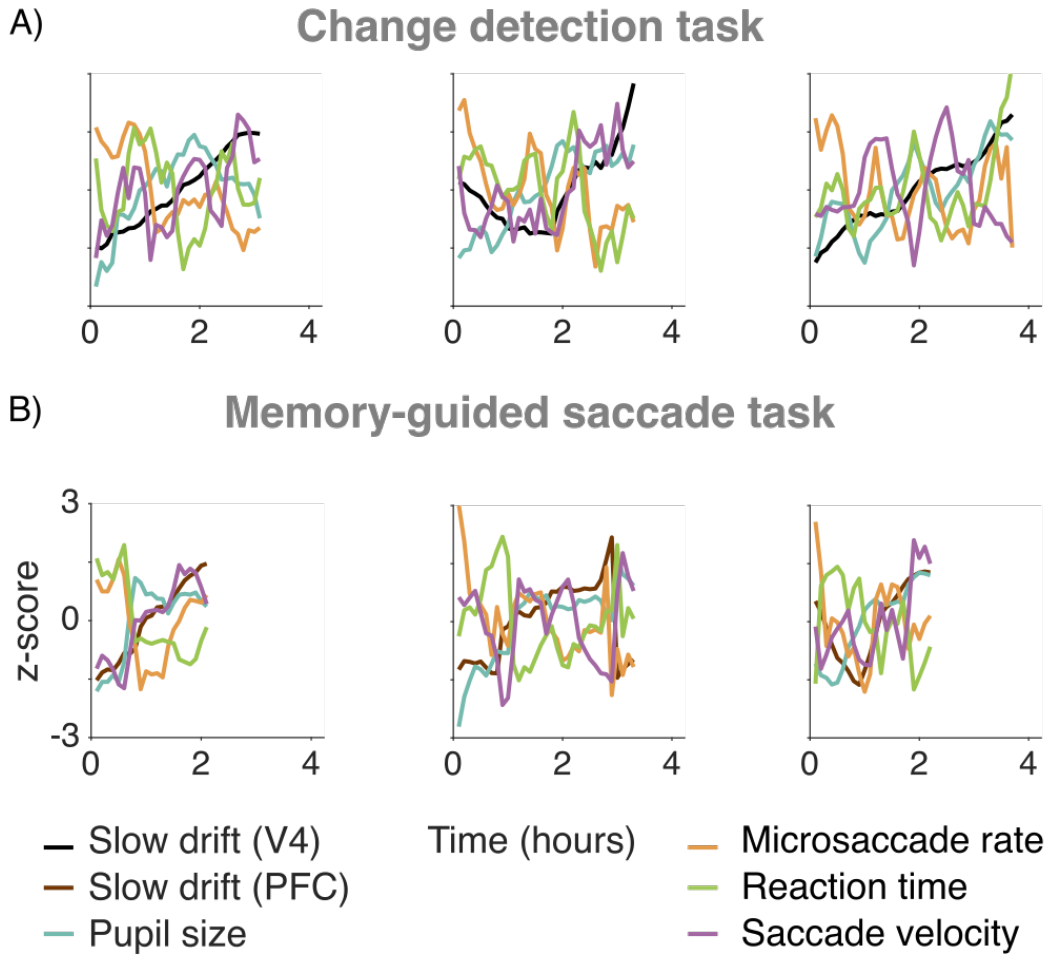

762

763 Figure 4 - figure supplement 3. Correlations between slow drift and the eye metrics. (A) Three  
764 example sessions from Monkey 2 on the change detection task. (B) Same as (A) but for the  
765 memory-guided saccade task (same subject).

766

767

768

769

770

771

772

773

774

775

776

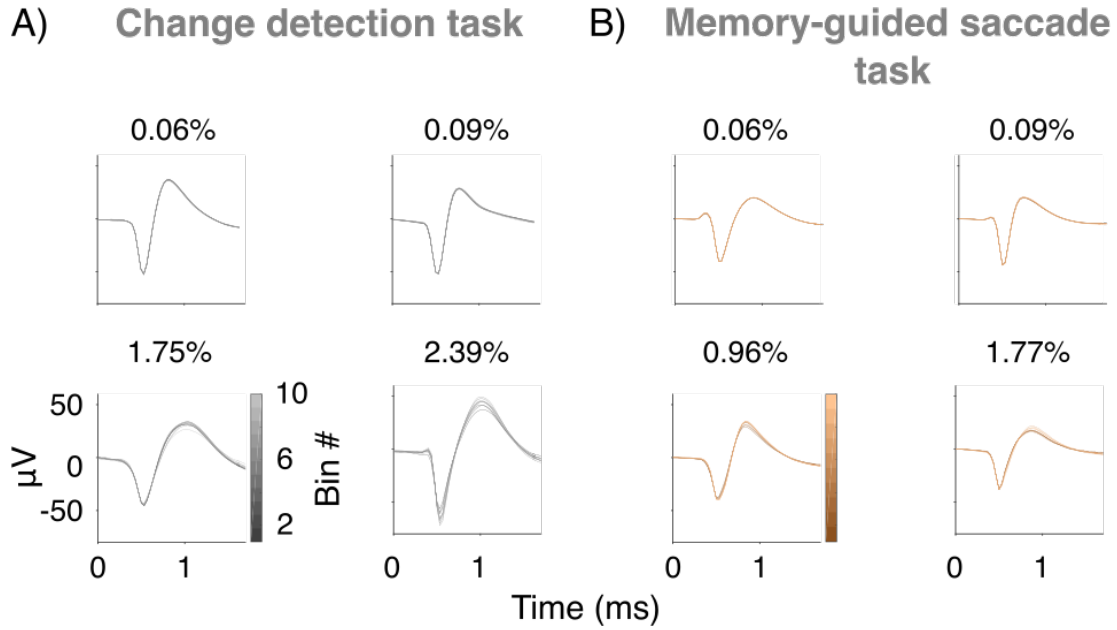

777

778 Figure 4 - figure supplement 4. Controlling for neural recording instabilities. (A) Percent  
779 waveform variance of four example neurons recorded from Monkey 1 during a single session on  
780 the change detection task. (B) Same as (A) but for the memory-guided saccade task (same subject).

781

782

783

784

785

786

787

788

789

790

791

792

793

794

## Change detection task (PFC slow drift)

795

796

797

798

799

800

801

802

803

804

805

806

807

808

809

810

811

812

813

814

815

816

817

818

819

820

821

822

823

824

825

826

827

828

829

830

831

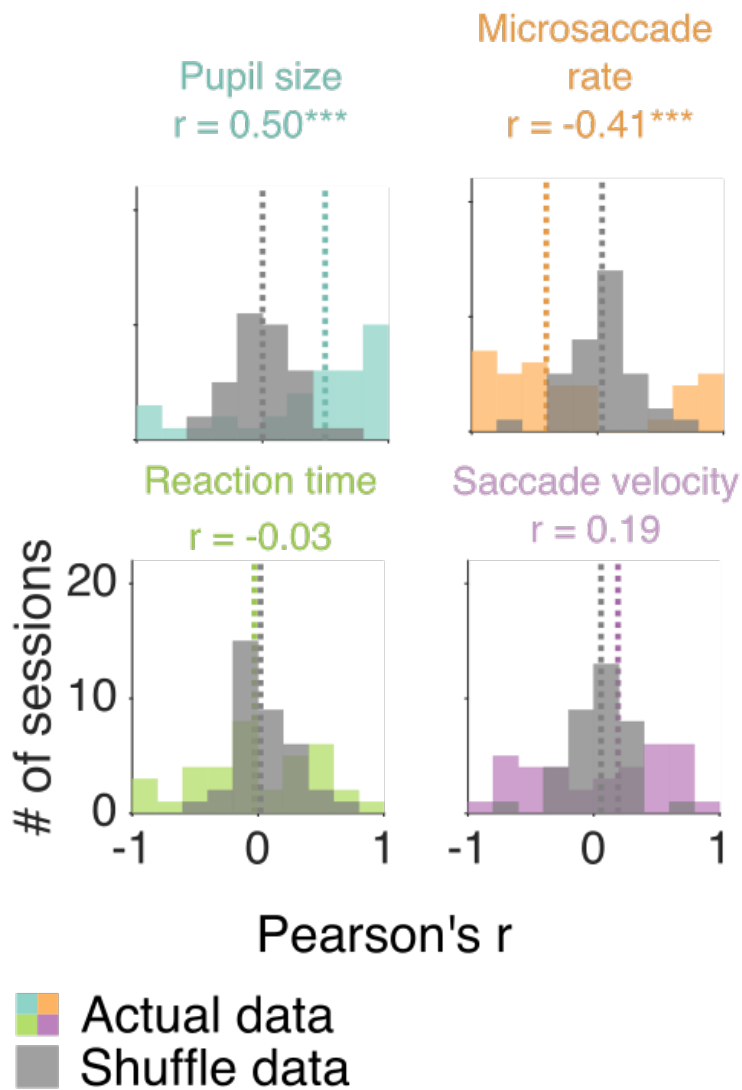

Figure 5 - figure supplement 1. Correlations between the eye metrics and PFC slow drift on the change detection task. Histograms showing actual and shuffled distributions of  $r$  values. Median  $r$  values across sessions are indicated by dashed lines (colored lines = actual data; gray lines = shuffled data). Actual distributions of  $r$  values were compared to shuffled distributions using two-sided permutation tests (difference of medians).  $p < 0.05^*$ ,  $p < 0.01^{**}$ ,  $p < 0.001^{***}$ .

832 Acknowledgements

833 D.I. was supported by National Institutes of Health (NIH) Grant T32 GM-008208 and the ARCS  
834 Foundation Thomas-Pittsburgh Chapter Award. M.A.S. was supported by NIH Grants R01 EY-  
835 022928, R01 MH-118929, R01 EB-026953, and P30 EY-008098; NSF Grant NCS 1734901; a  
836 career development grant and an unrestricted award from Research to Prevent Blindness; and the  
837 Eye and Ear Foundation of Pittsburgh. A.C.S. was supported by NIH grant K99EY025768. S.B.K.  
838 was supported by NIH Grant T32 EY-017271. The authors would like to thank Ms. Samantha  
839 Schmitt for assistance with surgery and data collection.

840

841 References

- 842 Ames, K. C., & Churchland, M. M. (2019). Motor cortex signals for each arm are mixed across  
843 hemispheres and neurons yet partitioned within the population response. *ELife*, *8*, 1–36.  
844 <https://doi.org/10.7554/eLife.46159>
- 845 Aslin, R. N. (2012). Infant eyes: A window on cognitive development. *Infancy*, *17*(1), 126–140.  
846 <https://doi.org/10.1111/j.1532-7078.2011.00097.x>
- 847 Aston-Jones, G., & Cohen, J. D. (2005). AN INTEGRATIVE THEORY OF LOCUS  
848 COERULEUS-NOREPINEPHRINE FUNCTION: Adaptive Gain and Optimal  
849 Performance. *Annual Review of Neuroscience*, *28*(1), 403–450.  
850 <https://doi.org/10.1146/annurev.neuro.28.061604.135709>
- 851 Aston-Jones, G., Rajkowski, J., Kubiak, P., & Alexinsky, T. (1994). Locus coeruleus neurons in  
852 monkey are selectively activated by attended cues in a vigilance task. *Journal of*  
853 *Neuroscience*, *14*(7), 4467–4480. <https://doi.org/10.1523/jneurosci.14-07-04467.1994>
- 854 Bair, W., & O’Keefe, L. R. (1998). The influence of fixational eye movements on the response

- 855 of neurons in area MT of the macaque. *Visual Neuroscience*, 15(4), 779–786.  
856 <https://doi.org/10.1017/S0952523898154160>
- 857 Bellet, J., Chen, C. Y., & Hafed, Z. M. (2017). Sequential hemifield gating of  $\alpha$ - and  $\beta$ -behavioral  
858 performance oscillations after microsaccades. *Journal of Neurophysiology*, 118(5), 2789–  
859 2805. <https://doi.org/10.1152/jn.00253.2017>
- 860 Benwell, C. S. Y., Tagliabue, C. F., Veniero, D., Cecere, R., Savazzi, S., & Thut, G. (2017).  
861 Prestimulus EEG power predicts conscious awareness but not objective visual performance.  
862 *ENeuro*, 4(6), 1–17. <https://doi.org/10.1523/ENEURO.0182-17.2017>
- 863 Brainard, D. H. (1997). The Psychophysics Toolbox. *Spatial Vision*, 10(4), 433–436.  
864 <https://doi.org/10.1163/156856897X00357>
- 865 Breton-Provencher, V., & Sur, M. (2019). Active control of arousal by a locus coeruleus  
866 GABAergic circuit. *Nature Neuroscience*, 22(2), 218–228. [https://doi.org/10.1038/s41593-](https://doi.org/10.1038/s41593-018-0305-z)  
867 [018-0305-z](https://doi.org/10.1038/s41593-018-0305-z)
- 868 Campbell, F. W., & Gregory, A. H. (1960). Effect of Size of Pupil on Visual Acuity. *Nature*,  
869 *187*(4743), 1121–1123. <https://doi.org/10.1038/1871121c0>
- 870 Carter, M. E., Yizhar, O., Chikahisa, S., Nguyen, H., Adamantidis, A., Nishino, S., ... De Lecea,  
871 L. (2010). Tuning arousal with optogenetic modulation of locus coeruleus neurons. *Nature*  
872 *Neuroscience*, 13(12), 1526–1535. <https://doi.org/10.1038/nn.2682>
- 873 Castellote, J. M., Kumru, H., Queralt, A., & Valls-Solé, J. (2007). A startle speeds up the  
874 execution of externally guided saccades. *Experimental Brain Research*, 177(1), 129–136.  
875 <https://doi.org/10.1007/s00221-006-0659-4>
- 876 Chen, C. Y., Ignashchenkova, A., Thier, P., & Hafed, Z. M. (2015). Neuronal response gain  
877 enhancement prior to microsaccades. *Current Biology*, 25(16), 2065–2074.

- 878 <https://doi.org/10.1016/j.cub.2015.06.022>
- 879 Clayton, E. C., Rajkowski, J., Cohen, J. D., & Aston-Jones, G. (2004). Phasic activation of  
880 monkey locus ceruleus neurons by simple decisions in a forced-choice task. *Journal of*  
881 *Neuroscience*, 24(44), 9914–9920. <https://doi.org/10.1523/JNEUROSCI.2446-04.2004>
- 882 Cook, E. P., & Maunsell, J. H. R. (2002). Dynamics of neuronal responses in macaque MT and  
883 VIP during motion detection. *Nature Neuroscience*, 5(10), 985–994.  
884 <https://doi.org/10.1038/nn924>
- 885 Cowley, B., Snyder, A., Acar, K., Williamson, R., Yu, B., & Smith, M. (2020). Slow drift of  
886 neural activity as a signature of impulsivity in macaque visual and prefrontal cortex.  
887 *Neuron*, 1–17. <https://doi.org/10.1101/2020.01.10.902403>
- 888 Cunningham, J. P., & Yu, B. M. (2014). Dimensionality reduction for large-scale neural  
889 recordings. *Nature Neuroscience*, 17(11), 1500–1509. <https://doi.org/10.1038/nn.3776>
- 890 Deuter, C. E., Schilling, T. M., Kuehl, L. K., Blumenthal, T. D., & Schachinger, H. (2013).  
891 Startle effects on saccadic responses to emotional target stimuli. *Psychophysiology*, 50(10),  
892 1056–1063. <https://doi.org/10.1111/psyp.12083>
- 893 Di Stasi, L. L., Catena, A., Cañas, J. J., Macknik, S. L., & Martinez-Conde, S. (2013). Saccadic  
894 velocity as an arousal index in naturalistic tasks. *Neuroscience and Biobehavioral Reviews*,  
895 37(5), 968–975. <https://doi.org/10.1016/j.neubiorev.2013.03.011>
- 896 DiGirolamo, G. J., Patel, N., & Blaukopf, C. L. (2016). Arousal facilitates involuntary eye  
897 movements. *Experimental Brain Research*, 234(7), 1967–1976.  
898 <https://doi.org/10.1007/s00221-016-4599-3>
- 899 Eckstein, M. K., Guerra-Carrillo, B., Miller Singley, A. T., & Bunge, S. A. (2017). Beyond eye  
900 gaze: What else can eyetracking reveal about cognition and cognitive development?



- 901        *Developmental Cognitive Neuroscience*, 25, 69–91.
- 902        <https://doi.org/10.1016/j.dcn.2016.11.001>
- 903    Elsayed, G. F., Lara, A. H., Kaufman, M. T., Churchland, M. M., & Cunningham, J. P. (2016).
- 904        Reorganization between preparatory and movement population responses in motor cortex.
- 905        *Nature Communications*, 7(1), 1–15. <https://doi.org/10.1038/ncomms13239>
- 906    Engbert, R., & Kliegl, R. (2003). Microsaccades uncover the orientation of covert attention.
- 907        *Vision Research*, 43(9), 1035–1045. [https://doi.org/10.1016/S0042-6989\(03\)00084-1](https://doi.org/10.1016/S0042-6989(03)00084-1)
- 908    Funahashi, S., Bruce, C. J., & Goldman-Rakic, P. S. (1989). Mnemonic coding of visual space in
- 909        the monkey's dorsolateral prefrontal cortex. *Journal of Neurophysiology*, 61(2), 331–349.
- 910        <https://doi.org/10.1152/jn.1989.61.2.331>
- 911    Gandhi, N. J., & Katnani, H. A. (2011). Motor Functions of the Superior Colliculus. *Annual*
- 912        *Review of Neuroscience*, 34(1), 205–231. [https://doi.org/10.1146/annurev-neuro-061010-](https://doi.org/10.1146/annurev-neuro-061010-113728)
- 913        113728
- 914    Gao, X., Yan, H., & Sun, H. J. (2015). Modulation of microsaccade rate by task difficulty
- 915        revealed through between- and within-trial comparisons. *Journal of Vision*, 15(3), 1–15.
- 916        <https://doi.org/10.1167/15.3.3>
- 917    German, D. C., & Bowden, D. M. (1975). Locus ceruleus in rhesus monkey (*Macaca mulatta*): A
- 918        combined histochemical fluorescence, Nissl and silver study. *Journal of Comparative*
- 919        *Neurology*, 161(1), 19–29. <https://doi.org/10.1002/cne.901610104>
- 920    Hanes, D. P., & Schall, J. D. (1996). Neural control of voluntary movement initiation. *Science*,
- 921        274(5286), 427–430. <https://doi.org/10.1126/science.274.5286.427>
- 922    Hannula, D. E., Althoff, R. R., Warren, D. E., Riggs, L., Cohen, N. J., & Ryan, J. D. (2010).
- 923        Worth a glance: Using eye movements to investigate the cognitive neuroscience of memory.

- 924 *Frontiers in Human Neuroscience*, 4(October), 1–16.
- 925 <https://doi.org/10.3389/fnhum.2010.00166>
- 926 Harvey, C. D., Coen, P., & Tank, D. W. (2012). Choice-specific sequences in parietal cortex  
927 during a virtual-navigation decision task. *Nature*, 484(7392), 62–68.
- 928 <https://doi.org/10.1038/nature10918>
- 929 Hayat, H., Regev, N., Matosevich, N., Sales, A., Paredes-rodriguez, E., Krom, A. J., ... Yizhar,  
930 O. (2020). Locus coeruleus norepinephrine activity mediates sensory-evoked awakenings  
931 from sleep, (April).
- 932 Herrington, T. M., Masse, N. Y., Hachmeh, K. J., Smith, J. E. T., Assad, J. A., & Cook, E. P.  
933 (2009). The effect of microsaccades on the correlation between neural activity and behavior  
934 in middle temporal, ventral intraparietal, and lateral intraparietal areas. *Journal of*  
935 *Neuroscience*, 29(18), 5793–5805. <https://doi.org/10.1523/JNEUROSCI.4412-08.2009>
- 936 Hessels, R. S., & Hooge, I. T. C. (2019). Eye tracking in developmental cognitive neuroscience –  
937 The good, the bad and the ugly. *Developmental Cognitive Neuroscience*, 40(September),  
938 100710. <https://doi.org/10.1016/j.dcn.2019.100710>
- 939 Huang, X., & Lisberger, S. G. (2009). Noise correlations in cortical area MT and their potential  
940 impact on trial-by-trial variation in the direction and speed of smooth-pursuit eye  
941 movements. *Journal of Neurophysiology*, 101(6), 3012–3030.
- 942 <https://doi.org/10.1152/jn.00010.2009>
- 943 Jolliffe, I. T., & Cadima, J. (2016). Principal component analysis: A review and recent  
944 developments. *Philosophical Transactions of the Royal Society A: Mathematical, Physical*  
945 *and Engineering Sciences*, 374(2065). <https://doi.org/10.1098/rsta.2015.0202>
- 946 Joshi, S., & Gold, J. I. (2019). Pupil size as a window on neural substrates of cognition. *Trends*

- 947        *in Cognitive Sciences*, (December), 1–24. <https://doi.org/10.31234/osf.io/dvsme>
- 948    Joshi, S., Li, Y., Kalwani, R. M., & Gold, J. I. (2016). Relationships between Pupil Diameter and  
949        Neuronal Activity in the Locus Coeruleus, Colliculi, and Cingulate Cortex. *Neuron*, *89*(1),  
950        221–234. <https://doi.org/10.1016/j.neuron.2015.11.028>
- 951    Kalwani, R. M., Joshi, S., & Gold, J. I. (2014). Phasic Activation of Individual Neurons in the  
952        Locus Ceruleus/Subceruleus Complex of Monkeys Reflects Rewarded Decisions to Go But  
953        Not Stop. *Journal of Neuroscience*, *34*(41), 13656–13669.  
954        <https://doi.org/10.1523/JNEUROSCI.2566-14.2014>
- 955    Kaufman, M. T., Churchland, M. M., Ryu, S. I., & Shenoy, K. V. (2014). Cortical activity in the  
956        null space: Permitting preparation without movement. *Nature Neuroscience*, *17*(3), 440–  
957        448. <https://doi.org/10.1038/nn.3643>
- 958    Kelly, R. C., Smith, M. A., Samonds, J. M., Kohn, A., Bonds, A. B., Movshon, J. A., & Sing  
959        Lee, T. (2007). Comparison of Recordings from Microelectrode Arrays and Single  
960        Electrodes in the Visual Cortex. *Journal of Neuroscience*, *27*(2), 261–264.  
961        <https://doi.org/10.1523/jneurosci.4906-06.2007>
- 962    Khanna, S. B., Snyder, A. C., & Smith, M. A. (2019). Distinct sources of variability affect eye  
963        movement preparation. *Journal of Neuroscience*, *39*(23), 4511–4526.  
964        <https://doi.org/10.1523/JNEUROSCI.2329-18.2019>
- 965    Khanna, S., Scott, J., & Smith, M. (2019). Dynamic shifts of visual and saccadic signals in  
966        prefrontal cortical regions 8Ar and FEF, (Ncs 1734901), 1–53.  
967        <https://doi.org/10.1101/817478>
- 968    Kimmel, D. L., Mammo, D., & Newsome, W. T. (2012). Tracking the eye non-invasively:  
969        Simultaneous comparison of the scleral search coil and optical tracking techniques in the

- 970 macaque monkey. *Frontiers in Behavioral Neuroscience*, 6(AUGUST), 1–17.
- 971 <https://doi.org/10.3389/fnbeh.2012.00049>
- 972 König, P., Osnabrück, U., Ossandón, J. P., Ehinger, B. V, Osnabrück, U., Gameiro, R. R., ...
- 973 Kaspar, K. (2016). Eye movements as a window to cognitive processes. *Journal of Eye*
- 974 *Movement Research*, 9(5), 1–16. <https://doi.org/10.16910/jemr.9.5.3>
- 975 Kowler, E. (2011). Eye movements: The past 25years. *Vision Research*, 51(13), 1457–1483.
- 976 <https://doi.org/10.1016/j.visres.2010.12.014>
- 977 Kristjánsson, Á., Vandenbroucke, M. W. G., & Driver, J. (2004). When pros become cons for
- 978 anti- versus prosaccades: Factors with opposite or common effects on different saccade
- 979 types. *Experimental Brain Research*, 155(2), 231–244. [https://doi.org/10.1007/s00221-003-](https://doi.org/10.1007/s00221-003-1717-9)
- 980 1717-9
- 981 Leopold, D. A., & Logothetis, N. K. (1998). Microsaccades differentially modulate neural
- 982 activity in the striate and extrastriate visual cortex. *Experimental Brain Research*, 123(3),
- 983 341–345. <https://doi.org/10.1007/s002210050577>
- 984 Li, Y., Hickey, L., Perrins, R., Werlen, E., Patel, A. A., Hirschberg, S., ... Pickering, A. E.
- 985 (2016). Retrograde optogenetic characterization of the pontospinal module of the locus
- 986 coeruleus with a canine adenoviral vector. *Brain Research*, 1641, 274–290.
- 987 <https://doi.org/10.1016/j.brainres.2016.02.023>
- 988 Liu, Y., Rodenkirch, C., Moskowitz, N., Schriver, B., & Wang, Q. (2017). Dynamic
- 989 Lateralization of Pupil Dilation Evoked by Locus Coeruleus Activation Results from
- 990 Sympathetic, Not Parasympathetic, Contributions. *Cell Reports*, 20(13), 3099–3112.
- 991 <https://doi.org/10.1016/j.celrep.2017.08.094>
- 992 Lowet, E., Gomes, B., Srinivasan, K., Zhou, H., Schafer, R. J., & Desimone, R. (2018).

- 993       Enhanced Neural Processing by Covert Attention only during Microsaccades Directed  
994       toward the Attended Stimulus. *Neuron*, 99(1), 207-214.e3.  
995       <https://doi.org/10.1016/j.neuron.2018.05.041>
- 996       Mante, V., Sussillo, D., Shenoy, K. V., & Newsome, W. T. (2013). Context-dependent  
997       computation by recurrent dynamics in prefrontal cortex. *Nature*, 503(7474), 78–84.  
998       <https://doi.org/10.1038/nature12742>
- 999       Martinez-Conde, S., Macknik, S. L., & Hubel, D. H. (2000). Microsaccadic eye movements and  
1000       firing of single cells in the striate cortex of macaque monkeys. *Nature Neuroscience*, 3(3),  
1001       251–258. <https://doi.org/10.1038/72961>
- 1002       Massot, C., Jagadisan, U. K., & Gandhi, N. J. (2019). Sensorimotor transformation elicits  
1003       systematic patterns of activity along the dorsoventral extent of the superior colliculus in the  
1004       macaque monkey. *Communications Biology*, 2(1), 1–14. [https://doi.org/10.1038/s42003-](https://doi.org/10.1038/s42003-019-0527-y)  
1005       019-0527-y
- 1006       Mathôt, S. (2018). Pupillometry: Psychology, Physiology, and Function, 1(1), 1–23.
- 1007       Murray, J. D., Bernacchia, A., Roy, N. A., Constantinidis, C., Romo, R., & Wang, X. J. (2017).  
1008       Stable population coding for working memory coexists with heterogeneous neural dynamics  
1009       in prefrontal cortex. *Proceedings of the National Academy of Sciences of the United States*  
1010       *of America*, 114(2), 394–399. <https://doi.org/10.1073/pnas.1619449114>
- 1011       O’Leary, J. G., & Lisberger, S. G. (2012). Role of the lateral intraparietal area in modulation of  
1012       the strength of sensory-motor transmission for visually guided movements. *Journal of*  
1013       *Neuroscience*, 32(28), 9745–9754. <https://doi.org/10.1523/JNEUROSCI.0269-12.2012>
- 1014       Pelli, D. G. (1997). The VideoToolbox software for visual psychophysics: Transforming  
1015       numbers into movies. *Spatial Vision*, 10(4), 437–442.

- 1016 <https://doi.org/10.1163/156856897X00366>
- 1017 Quinlan, M. A. L., Strong, V. M., Skinner, D. M., Martin, G. M., Harley, C. W., & Walling, S.  
1018 G. (2019). Locus coeruleus optogenetic light activation induces long-term potentiation of  
1019 perforant path population spike amplitude in rat dentate gyrus. *Frontiers in Systems*  
1020 *Neuroscience*, 12(January), 1–14. <https://doi.org/10.3389/fnsys.2018.00067>
- 1021 Rabinowitz, N. C., Goris, R. L., Cohen, M., & Simoncelli, E. P. (2015). Attention stabilizes the  
1022 shared gain of V4 populations. *ELife*, 4(NOVEMBER2015), 1–24.  
1023 <https://doi.org/10.7554/eLife.08998>
- 1024 Reimer, J., Froudarakis, E., Cadwell, C. R., Yatsenko, D., Denfield, G. H., & Tolias, A. S.  
1025 (2014). Pupil Fluctuations Track Fast Switching of Cortical States during Quiet  
1026 Wakefulness. *Neuron*, 84(2), 355–362. <https://doi.org/10.1016/j.neuron.2014.09.033>
- 1027 Reimer, J., McGinley, M. J., Liu, Y., Rodenkirch, C., Wang, Q., McCormick, D. A., & Tolias, A.  
1028 S. (2016). Pupil fluctuations track rapid changes in adrenergic and cholinergic activity in  
1029 cortex. *Nature Communications*, 7(May), 1–7. <https://doi.org/10.1038/ncomms13289>
- 1030 Remington, E. D., Narain, D., Hosseini, E. A., & Jazayeri, M. (2018). Flexible Sensorimotor  
1031 Computations through Rapid Reconfiguration of Cortical Dynamics. *Neuron*, 98(5), 1005-  
1032 1019.e5. <https://doi.org/10.1016/j.neuron.2018.05.020>
- 1033 Roitman, J. D., & Shadlen, M. N. (2002). Response of neurons in the lateral intraparietal area  
1034 during a combined visual discrimination reaction time task. *Journal of Neuroscience*,  
1035 22(21), 9475–9489. <https://doi.org/10.1523/jneurosci.22-21-09475.2002>
- 1036 Rolfs, M. (2009). Microsaccades: Small steps on a long way. *Vision Research*, 49(20), 2415–  
1037 2441. <https://doi.org/10.1016/j.visres.2009.08.010>
- 1038 Ryan, J. D., & Shen, K. (2020). The eyes are a window into memory. *Current Opinion in*

- 1039 *Behavioral Sciences*, 32, 1–6. <https://doi.org/10.1016/j.cobeha.2019.12.014>
- 1040 Sadtler, P. T., Quick, K. M., Golub, M. D., Chase, S. M., Ryu, S. I., Tyler-Kabara, E. C., ...  
1041 Batista, A. P. (2014). Neural constraints on learning. *Nature*, 512(7515), 423–426.  
1042 <https://doi.org/10.1038/nature13665>
- 1043 Samaha, J., Iemi, L., & Postle, B. R. (2017). Prestimulus alpha-band power biases visual  
1044 discrimination confidence, but not accuracy. *Consciousness and Cognition*, 54, 47–55.  
1045 <https://doi.org/10.1016/j.concog.2017.02.005>
- 1046 Sara, S. J. (2009). The locus coeruleus and noradrenergic modulation of cognition. *Nature*  
1047 *Reviews Neuroscience*, 10(3), 211–223. <https://doi.org/10.1038/nrn2573>
- 1048 Shadlen, M. N., Britten, K. H., Newsome, W. T., & Movshon, J. A. (1996). A computational  
1049 analysis of the relationship between neuronal and behavioral responses to visual motion.  
1050 *Journal of Neuroscience*, 16(4), 1486–1510. [https://doi.org/10.1523/jneurosci.16-04-](https://doi.org/10.1523/jneurosci.16-04-01486.1996)  
1051 [01486.1996](https://doi.org/10.1523/jneurosci.16-04-01486.1996)
- 1052 Sharma, Y., Xu, T., Graf, W. M., Fobbs, A., Sherwood, C. C., Hof, P. R., ... Manaye, K. F.  
1053 (2010). Comparative anatomy of the locus coeruleus in humans and nonhuman primates.  
1054 *Journal of Comparative Neurology*, 518(7), 963–971. <https://doi.org/10.1002/cne.22249>
- 1055 Shoham, S., Fellows, M. R., & Normann, R. A. (2003). Robust, automatic spike sorting using  
1056 mixtures of multivariate t-distributions. *Journal of Neuroscience Methods*, 127(2), 111–122.  
1057 [https://doi.org/10.1016/S0165-0270\(03\)00120-1](https://doi.org/10.1016/S0165-0270(03)00120-1)
- 1058 Siegenthaler, E., Costela, F. M., Mccamy, M. B., Di Stasi, L. L., Otero-Millan, J., Sonderegger,  
1059 A., ... Martinez-Conde, S. (2014). Task difficulty in mental arithmetic affects  
1060 microsaccadic rates and magnitudes. *European Journal of Neuroscience*, 39(2), 287–294.  
1061 <https://doi.org/10.1111/ejn.12395>

- 1062 Smith, M. A., & Sommer, M. A. (2013). Spatial and Temporal Scales of Neuronal Correlation in  
1063 Visual Area V4. *Journal of Neuroscience*, *33*(12), 5422–5432.  
1064 <https://doi.org/10.1523/JNEUROSCI.4782-12.2013>
- 1065 Snodderly, D. M., Kagan, I., & Moshe, G. (2001). Selective activation of visual cortex neurons  
1066 by fixational eye movements: Implications for neural coding. *Visual Neuroscience*, *18*(2),  
1067 259–277. <https://doi.org/10.1017/S0952523801182118>
- 1068 Snyder, A. C., Yu, B. M., & Smith, M. A. (2018). Distinct population codes for attention in the  
1069 absence and presence of visual stimulation. *Nature Communications*, *9*(1), 4382.  
1070 <https://doi.org/10.1038/s41467-018-06754-5>
- 1071 Sparks, D. L., & Hartwich-Young, R. (1989). The deep layers of the superior colliculus. *Reviews*  
1072 *of Oculomotor Research*.
- 1073 Stavisky, S. D., Kao, J. C., Ryu, S. I., & Shenoy, K. V. (2017). Motor Cortical Visuomotor  
1074 Feedback Activity Is Initially Isolated from Downstream Targets in Output-Null Neural  
1075 State Space Dimensions. *Neuron*, *95*(1), 195-208.e9.  
1076 <https://doi.org/10.1016/j.neuron.2017.05.023>
- 1077 Steinmetz, N. A., & Moore, T. (2019). Changes in the Response Rate and Response Variability  
1078 of Area V4 Neurons During the Preparation of Saccadic Eye Movements, 1171–1178.  
1079 <https://doi.org/10.1152/jn.00689.2009>.
- 1080 Stringer, C., Pachitariu, M., Steinmetz, N., Reddy, C. B., Carandini, M., & Harris, K. D. (2019).  
1081 Spontaneous behaviors drive multidimensional, brainwide activity. *Science*, *364*(6437).  
1082 <https://doi.org/10.1126/science.aav7893>
- 1083 Supèr, H., & Lamme, V. A. F. (2007). Strength of figure-ground activity in monkey primary  
1084 visual cortex predicts saccadic reaction time in a delayed detection task. *Cerebral Cortex*,



- 1085 17(6), 1468–1475. <https://doi.org/10.1093/cercor/bhl058>
- 1086 Valsecchi, M., Betta, E., & Turatto, M. (2007). Visual oddballs induce prolonged microsaccadic  
1087 inhibition. *Experimental Brain Research*, 177(2), 196–208. <https://doi.org/10.1007/s00221->  
1088 006-0665-6
- 1089 Valsecchi, M., & Turatto, M. (2009). Microsaccadic responses in a bimodal oddball task.  
1090 *Psychological Research*, 73(1), 23–33. <https://doi.org/10.1007/s00426-008-0142-x>
- 1091 van den Brink, R. L., Pfeffer, T., & Donner, T. H. (2019). Brainstem Modulation of Large-Scale  
1092 Intrinsic Cortical Activity Correlations. *Frontiers in Human Neuroscience*, 13(October), 1–  
1093 18. <https://doi.org/10.3389/fnhum.2019.00340>
- 1094 Van Dijk, H., Schoffelen, J. M., Oostenveld, R., & Jensen, O. (2008). Prestimulus oscillatory  
1095 activity in the alpha band predicts visual discrimination ability. *Journal of Neuroscience*,  
1096 28(8), 1816–1823. <https://doi.org/10.1523/JNEUROSCI.1853-07.2008>
- 1097 Varazzani, C., San-Galli, A., Gilardeau, S., & Bouret, S. (2015). Noradrenaline and dopamine  
1098 neurons in the reward/effort trade-off: A direct electrophysiological comparison in behaving  
1099 monkeys. *Journal of Neuroscience*, 35(20), 7866–7877.  
1100 <https://doi.org/10.1523/JNEUROSCI.0454-15.2015>
- 1101 Vazey, E. M., & Aston-Jones, G. (2014). Designer receptor manipulations reveal a role of the  
1102 locus coeruleus noradrenergic system in isoflurane general anesthesia. *Proceedings of the*  
1103 *National Academy of Sciences of the United States of America*, 111(10), 3859–3864.  
1104 <https://doi.org/10.1073/pnas.1310025111>
- 1105 Wang, C.-A., Baird, T., Huang, J., Coutinho, J. D., Brien, D. C., & Munoz, D. P. (2018). Arousal  
1106 Effects on Pupil Size, Heart Rate, and Skin Conductance in an Emotional Face Task.  
1107 *Frontiers in Neurology*, 9(December), 1–13. <https://doi.org/10.3389/fneur.2018.01029>

- 1108 Wang, C. A., & Munoz, D. P. (2015). A circuit for pupil orienting responses: Implications for  
1109 cognitive modulation of pupil size. *Current Opinion in Neurobiology*, 33(Figure 1), 134–  
1110 140. <https://doi.org/10.1016/j.conb.2015.03.018>
- 1111 Zuber, B. L., Stark, L., & Cook, G. (1965). Microsaccades and the velocity-amplitude  
1112 relationship for saccadic eye movements. *Science*, 150(3702), 1459–1460.  
1113 <https://doi.org/10.1126/science.150.3702.1459>
- 1114
